# Supplementary material for: Integration of the metabolome and transcriptome reveals indigo biosynthesis in Phaius flavus flowers under freezing treatment
Source: PeerJ. 2022 Mar 14;10:e13106. doi: 10.7717/peerj.13106 (PMC8929171; doi:10.7717/peerj.13106)
Supplement: Supplemental Information 2 [file peerj-10-13106-s002.xlsx]

## Sheet: Schedule
Table S1. Metabolic pathway analysis of P. flavus transcriptome in KEGG annotation system
Pathway	Pathway_id	Gene Count
Metabolic pathways	ko01100	20746
Biosynthesis of secondary metabolites	ko01110	9668
RNA transport	ko03013	2963
Carbon metabolism	ko01200	2289
Biosynthesis of amino acids	ko01230	2240
Ribosome	ko03010	2154
Protein processing in endoplasmic reticulum	ko04141	2035
Spliceosome	ko03040	2031
Endocytosis	ko04144	1762
Plant-pathogen interaction	ko04626	1745
Plant hormone signal transduction	ko04075	1740
mRNA surveillance pathway	ko03015	1724
Starch and sucrose metabolism	ko00500	1647
Amino sugar and nucleotide sugar metabolism	ko00520	1625
MAPK signaling pathway - plant	ko04016	1473
Phenylpropanoid biosynthesis	ko00940	1430
Pentose and glucuronate interconversions	ko00040	1383
Purine metabolism	ko00230	1367
Galactose metabolism	ko00052	1299
RNA degradation	ko03018	1195
Oxidative phosphorylation	ko00190	1170
Ubiquitin mediated proteolysis	ko04120	1149
Glycolysis / Gluconeogenesis	ko00010	1118
ABC transporters	ko02010	1086
Ascorbate and aldarate metabolism	ko00053	1074
Pyruvate metabolism	ko00620	1008
Cysteine and methionine metabolism	ko00270	960
Peroxisome	ko04146	921
Glycerophospholipid metabolism	ko00564	868
Ribosome biogenesis in eukaryotes	ko03008	741
Carbon fixation in photosynthetic organisms	ko00710	737
RNA polymerase	ko03020	736
Other glycan degradation	ko00511	726
Glycerolipid metabolism	ko00561	726
Proteasome	ko03050	710
Fatty acid metabolism	ko01212	692
Inositol phosphate metabolism	ko00562	681
Phagosome	ko04145	680
Cyanoamino acid metabolism	ko00460	674
Aminoacyl-tRNA biosynthesis	ko00970	674
Phosphatidylinositol signaling system	ko04070	671
Glyoxylate and dicarboxylate metabolism	ko00630	670
Sphingolipid metabolism	ko00600	638
Nucleotide excision repair	ko03420	630
Homologous recombination	ko03440	628
Glycine, serine and threonine metabolism	ko00260	614
Valine, leucine and isoleucine degradation	ko00280	596
Pyrimidine metabolism	ko00240	578
Terpenoid backbone biosynthesis	ko00900	565
Fructose and mannose metabolism	ko00051	548
Fatty acid degradation	ko00071	546
beta-Alanine metabolism	ko00410	545
Glutathione metabolism	ko00480	539
2-Oxocarboxylic acid metabolism	ko01210	539
Autophagy - other	ko04136	525
Alanine, aspartate and glutamate metabolism	ko00250	519
Citrate cycle (TCA cycle)	ko00020	501
Circadian rhythm - plant	ko04712	492
DNA replication	ko03030	491
Ubiquinone and other terpenoid-quinone biosynthesis	ko00130	490
Lysine degradation	ko00310	489
Phenylalanine, tyrosine and tryptophan biosynthesis	ko00400	475
Arginine and proline metabolism	ko00330	474
Propanoate metabolism	ko00640	458
Tyrosine metabolism	ko00350	442
N-Glycan biosynthesis	ko00510	439
Tryptophan metabolism	ko00380	437
Fatty acid biosynthesis	ko00061	416
Mismatch repair	ko03430	416
Cutin, suberine and wax biosynthesis	ko00073	413
Porphyrin and chlorophyll metabolism	ko00860	411
Basal transcription factors	ko03022	411
Phenylalanine metabolism	ko00360	395
Diterpenoid biosynthesis	ko00904	392
Pentose phosphate pathway	ko00030	378
Base excision repair	ko03410	370
Protein export	ko03060	366
Betalain biosynthesis	ko00965	357
alpha-Linolenic acid metabolism	ko00592	344
Isoquinoline alkaloid biosynthesis	ko00950	337
Glycosaminoglycan degradation	ko00531	331
Photosynthesis	ko00195	313
Arginine biosynthesis	ko00220	308
Sesquiterpenoid and triterpenoid biosynthesis	ko00909	306
Tropane, piperidine and pyridine alkaloid biosynthesis	ko00960	305
SNARE interactions in vesicular transport	ko04130	304
Carotenoid biosynthesis	ko00906	301
Flavonoid biosynthesis	ko00941	300
Nicotinate and nicotinamide metabolism	ko00760	299
AGE-RAGE signaling pathway in diabetic complications	ko04933	284
Folate biosynthesis	ko00790	281
Ether lipid metabolism	ko00565	268
Sulfur metabolism	ko00920	265
Pantothenate and CoA biosynthesis	ko00770	264
Nitrogen metabolism	ko00910	255
Glycosphingolipid biosynthesis - ganglio series	ko00604	228
Linoleic acid metabolism	ko00591	217
Monobactam biosynthesis	ko00261	214
Glycosylphosphatidylinositol (GPI)-anchor biosynthesis	ko00563	214
Lysine biosynthesis	ko00300	210
Biosynthesis of unsaturated fatty acids	ko01040	205
Butanoate metabolism	ko00650	200
Riboflavin metabolism	ko00740	197
One carbon pool by folate	ko00670	184
Selenocompound metabolism	ko00450	182
Fatty acid elongation	ko00062	176
Steroid biosynthesis	ko00100	173
Histidine metabolism	ko00340	172
Caffeine metabolism	ko00232	169
Other types of O-glycan biosynthesis	ko00514	167
Brassinosteroid biosynthesis	ko00905	156
Arachidonic acid metabolism	ko00590	153
Thiamine metabolism	ko00730	138
Valine, leucine and isoleucine biosynthesis	ko00290	133
Stilbenoid, diarylheptanoid and gingerol biosynthesis	ko00945	133
Biosynthesis of secondary metabolites - unclassified	ko00999	133
Biotin metabolism	ko00780	115
Taurine and hypotaurine metabolism	ko00430	105
Monoterpenoid biosynthesis	ko00902	105
Limonene and pinene degradation	ko00903	85
Zeatin biosynthesis	ko00908	84
Sulfur relay system	ko04122	83
Flavone and flavonol biosynthesis	ko00944	81
Vitamin B6 metabolism	ko00750	80
Photosynthesis - antenna proteins	ko00196	77
Glycosphingolipid biosynthesis - globo and isoglobo series	ko00603	77
Synthesis and degradation of ketone bodies	ko00072	76
Non-homologous end-joining	ko03450	76
Indole alkaloid biosynthesis	ko00901	65
C5-Branched dibasic acid metabolism	ko00660	56
Phosphonate and phosphinate metabolism	ko00440	55
Mannose type O-glycan biosynthesis	ko00515	42
Isoflavonoid biosynthesis	ko00943	41
Aflatoxin biosynthesis	ko00254	39
Glucosinolate biosynthesis	ko00966	29
Vancomycin resistance	ko01502	29
Lipoic acid metabolism	ko00785	28
Anthocyanin biosynthesis	ko00942	22
Benzoxazinoid biosynthesis	ko00402	16
Glycosphingolipid biosynthesis - lacto and neolacto series	ko00601	9
Biosynthesis of secondary metabolites - other antibiotics	ko00998	4
