# Supplementary material for: Integration of the metabolome and transcriptome reveals indigo biosynthesis in Phaius flavus flowers under freezing treatment
Source: PeerJ. 2022 Mar 14;10:e13106. doi: 10.7717/peerj.13106 (PMC8929171; doi:10.7717/peerj.13106)
Supplement: Supplemental Information 3 [file peerj-10-13106-s003.xlsx]

## Sheet: Sheet1
Primer sequences of several pigment-related genes used to perform real-time reverse transcription-PCR to validate expression values
Actin		Forward primer	CACAACAACAGCAGAACGGG	Reverse primer	ACCAGCAGCCTCCATACCTA	220
CYP	Cluster-38184.135548	Forward primer	GGCTCTCTACCACATCGCTC	Reverse primer	GCCTTAAGAGAAGGGCGGTT	167
UGT1	Cluster-12505.0	Forward primer	GAGCGCAAAGCTTACGAAGG	Reverse primer	CGCCAACTATTGCCTCAAGC	197
UGT2	Cluster-38184.119005	Forward primer	GTCGACGGGCGGATTTCTAT	Reverse primer	CTTCACCACCCTCGCAATCT	205
GLU	Cluster-38184.103035	Forward primer	GGCATGTATGTCAGAGCGGA	Reverse primer	TGCCGTTGGGAATGAACCTT	205
TSA	Cluster-38184.103420	Forward primer	GTGCATGCTCAGTGGAGGTT	Reverse primer	GGGCTGCCTTACTCTGATCC	208
ASA	Cluster-38184.203518	Forward primer	GTCCTGAGAGCAAGAGCGAT	Reverse primer	GGTGGGAACAGTTAGCGGTG	144
IGPS	Cluster-38184.112687	Forward primer	TGCTCGGTCAAAAGGAGCAG	Reverse primer	CCATCAATGCCCAAGACACG	159
PAI	Cluster-38184.138823	Forward primer	GAGATCGCGATACGTCGGAG	Reverse primer	CCCTGCATGAGGAAATGGGA	163
