# Supplementary material for: Integration of the metabolome and transcriptome reveals indigo biosynthesis in Phaius flavus flowers under freezing treatment
Source: PeerJ. 2022 Mar 14;10:e13106. doi: 10.7717/peerj.13106 (PMC8929171; doi:10.7717/peerj.13106)
Supplement: Supplemental Information 4 [file peerj-10-13106-s004.xlsx]

## Sheet: GLU
ID	T-injure-H-1_fpkm	T-injure-H-2_fpkm	T-injure-H-3_fpkm	T-normal-Q-1_fpkm	T-normal-Q-2_fpkm	T-normal-Q-3_fpkm	T-injure-H-1_count	T-injure-H-2_count	T-injure-H-3_count	T-normal-Q-1_count	T-normal-Q-2_count	T-normal-Q-3_count	log2FoldChange	pvalue	padj	regulated	KEGG	NR	Swissprot	Tremble	KOG	GO	Pfam	Sequence
Cluster-38184.121591	49.27	48.87	13.95	0	0	0	641.19	621.08	213.99	0	0	0	11.2466	5.52553e-18	1.47412e-16	up	K19892 glucan endo-1,3-beta-glucosidase 4 [EC:3.2.1.39] | (RefSeq) glucan endo-1,3-beta-glucosidase 4-like (A)	glucan endo-1,3-beta-glucosidase 2-like [Dendrobium catenatum]	RecName: Full=Glucan endo-1,3-beta-glucosidase 1; EC=3.2.1.39; AltName: Full=(1->3)-beta-glucan endohydrolase 1; Short=(1->3)-beta-glucanase 1; AltName: Full=Beta-1,3-endoglucanase 1; Short=Beta-1,3-glucanase 1; Flags: Precursor;	SubName: Full=Glucan endo-1,3-beta-glucosidase 1 {ECO:0000313|EMBL:PKU74306.1};	--	GO:0046658,anchored component of plasma membrane; GO:0042973,glucan endo-1,3-beta-D-glucosidase activity; GO:0004553,hydrolase activity, hydrolyzing O-glycosyl compounds; GO:0030247,polysaccharide binding; GO:0005975,carbohydrate metabolic process; GO:0006952,defense response	X8 domain	TTGTATAAATTCTAACATGAATGATGTAATTACTGTCTTTTTGGTATGACTTCTCACATCCACAAAAGAAATACATTTTCTTATGCATCTGAAATTCTCAAATAATCACAAAGTATTAATTTACAGTCATTGTTCATTCAAAGAATTTACCTACCTTCATCTTTTTGACTGCCTTCTGATCAAACATAAACAATTTACGATCACAAAACATGTGGATTAGGTCAAACATAGAAGGGGTCAAATTTGCACATGCAGCTTCTTACAGAAGAGACTCTTATCTATGTGATCTAGAAACTTTGCAAAGAAAAAAATACCAGTGGTGAAAGATAAACCAACATGTGAACTTGTAGGTCTGAAACACCATTTTCGCCATCTATCGGTACAAATGGAGTAAAAGGA…
Cluster-38184.103035	5.52	4.58	0.38	0	0	0	168.86	137.37	13.75	0	0	0	9.06333	1.10897e-08	1.04974e-07	up	K19893 glucan endo-1,3-beta-glucosidase 5/6 [EC:3.2.1.39] | (RefSeq) glucan endo-1,3-beta-glucosidase 6-like (A)	glucan endo-1,3-beta-glucosidase 6-like [Dendrobium catenatum]	RecName: Full=Glucan endo-1,3-beta-glucosidase 6; EC=3.2.1.39; AltName: Full=(1->3)-beta-glucan endohydrolase 6; Short=(1->3)-beta-glucanase 6; AltName: Full=Beta-1,3-endoglucanase 6; Short=Beta-1,3-glucanase 6; Flags: Precursor;	SubName: Full=Glucan endo-1,3-beta-glucosidase 6 {ECO:0000313|EMBL:PKU62026.1};	--	GO:0031225,anchored component of membrane; GO:0046658,anchored component of plasma membrane; GO:0005886,plasma membrane; GO:0009506,plasmodesma; GO:0042973,glucan endo-1,3-beta-D-glucosidase activity; GO:0004553,hydrolase activity, hydrolyzing O-glycosyl compounds; GO:0030247,polysaccharide binding; GO:0005975,carbohydrate metabolic process; GO:0006952,defense response	X8 domain	TTAATATTGAAAAAAAAGCCATATTCTGACACTCACCTTATAAGATAGAATAAGGAAACACTTCTTGAGAGTACTTGACATATGAAATTGCCTAACTTGACATAGTTAAGATCTGAATGGTCATTGATAGCCTGTAACGTTCCCAAAATGACAAATGTACCAACAGATTAAAACAATGTAATCAAAAACATGAAAGACATGTACAAAAGATAAACCACAATAATACACCAATCTCTAACTCCTCTGAGTCTCCTTGAAAGTCCAGAATCAGTCTCGATCATGATCTCAAATCTACAGGTCAGAGTAGACGGGTCCTTACTTGTGAGGGTTGCTAGATTATTGAAACCACAGGCTACATCATCTTGATCATTCTTTTGGTAGTAGCTATTGAAAGCATAA…
Cluster-38184.110104	11.55	22.76	4.03	0	0.47	0	94.82	181.64	38.55	0	3.14	0	6.48595	5.38496e-08	4.61271e-07	up	K01188 beta-glucosidase [EC:3.2.1.21] | (RefSeq) beta-glucosidase 24-like (A)	beta-glucosidase 24-like [Phalaenopsis equestris]	RecName: Full=Furostanol glycoside 26-O-beta-glucosidase {ECO:0000303|PubMed:8766714}; Short=CsF26G {ECO:0000303|PubMed:8766714}; EC=3.2.1.186 {ECO:0000269|PubMed:8549824, ECO:0000269|PubMed:8766714}; AltName: Full=Protodioscin 26-O-beta-D-glucosidase; Flags: Precursor;	SubName: Full=Beta-glucosidase 12 {ECO:0000313|EMBL:PKA59460.1}; EC=3.2.1.21 {ECO:0000313|EMBL:PKA59460.1};	Beta-glucosidase, lactase phlorizinhydrolase, and related proteins	GO:0009507,chloroplast; GO:0004553,hydrolase activity, hydrolyzing O-glycosyl compounds; GO:0005975,carbohydrate metabolic process	Glycosyl hydrolase family 1	AAAAATCTTATTGTATCAGATATAAATGAGAATTTGACTTTTAATAGAACACAATGGAGTAAAATGATTTATGTAGCCGATCCCACGTAGTGGATTATGGCTTGTTTTTGTTGTTGTAATATTGTATTTTAGCTTACATGTGGATATTTTCACAGGGAGGACTACAAAAACTTTGCACAACTATGTTTTGTCGAATTTGGCCATAAAGTGAAGCATTGGATCACCATAAATGAACCATATACATTTTCTTGTTATGGATATGGCACTGGACAAGCTGCCCCTGGTCATTGTACTCCAGATTTGGAAGTTCGTGGAGTACATTATACTTGCCCTACTGGAGATTCTCTTAGAGAACCTTATCAAGTTGTTCATAATATGCTCTTAGCTCATGCAGAAGCA…
Cluster-38184.69677	0.24	4.07	3.47	0.11	0	0	9.3	153.33	159.17	5.05	0	0	5.91261	2.42567e-05	0.000135737	up	K19891 glucan endo-1,3-beta-glucosidase 1/2/3 [EC:3.2.1.39] | (RefSeq) hypothetical protein (A)	glucan endo-1,3-beta-glucosidase 7-like [Dendrobium catenatum]	RecName: Full=Glucan endo-1,3-beta-glucosidase 7; EC=3.2.1.39; AltName: Full=(1->3)-beta-glucan endohydrolase 7; Short=(1->3)-beta-glucanase 7; AltName: Full=Beta-1,3-endoglucanase 7; Short=Beta-1,3-glucanase 7; Flags: Precursor;	SubName: Full=Glucan endo-1,3-beta-glucosidase 7 {ECO:0000313|EMBL:PKU74203.1};	--	GO:0046658,anchored component of plasma membrane; GO:0005618,cell wall; GO:0005576,extracellular region; GO:0042973,glucan endo-1,3-beta-D-glucosidase activity; GO:0004553,hydrolase activity, hydrolyzing O-glycosyl compounds; GO:0030247,polysaccharide binding; GO:0005975,carbohydrate metabolic process; GO:0071555,cell wall organization	X8 domain	CTCTCTCTCTCTCTCTCTCTCTCGGTCCATGGCGCCAAGCATTCGCCTCTTTTTCGCGATGGCCACGCCCCTCTTCAGCTTTTTTTTCTCTTCTGCAAGTTCCCAGTCGTTTATCGGAGTGAACTACGGGCAAGTTGCAGATAACCTCCCCTCTCCTTCGGTTACTGTCCAACTCCTCCGTTCCACCACCATCGCCAAAATCCGCCTCTACGGCGCCGACCCCGCCATTCTCCACGCCCTCTCCAGCACACAAATATCTGCCGTCATCGGCGTGGCAAACGGTGAAATCACCTCCCTCGCCAGCAACCCCTCCGTCGCCTCCCGCTGGGTCGCCTCCAACGTCCTACCCTTTCTCCCTTCCACCTCCATTTCATCGATCTCTGTCGGAAACGAAGCCCT…
Cluster-44823.0	5.83	2.59	0.22	0.4	0	0	73.69	31.92	3.3	5.87	0	0	4.22074	0.0123147	0.0359935	up	K19891 glucan endo-1,3-beta-glucosidase 1/2/3 [EC:3.2.1.39] | (RefSeq) glucan endo-1,3-beta-glucosidase 1-like (A)	glucan endo-1,3-beta-D-glucosidase-like [Dendrobium catenatum]	RecName: Full=Glucan endo-1,3-beta-D-glucosidase; EC=3.2.1.39; AltName: Full=Major pollen allergen Ole e 9; AltName: Allergen=Ole e 9; Flags: Precursor;	SubName: Full=Glucan endo-1,3-beta-D-glucosidase {ECO:0000313|EMBL:PKU85662.1};	--	GO:0005576,extracellular region; GO:0042973,glucan endo-1,3-beta-D-glucosidase activity; GO:0042803,protein homodimerization activity; GO:0006076,(1->3)-beta-D-glucan catabolic process	X8 domain	TTGCCATAACCTGCACAGTATTCAGTTTGTAAATTTTAATTTAAACAGATTTAAATAAAAAAATGTAATTCTGTTCTAGCTGTATCTCTCTATAAAACATAAATTTGATGAAAGAATTGTACTATGTGATGAGGAAGAGAAAGAAACTGCGCCTTGAAAGTAAATTCATATTCCGTTGAAGCTTTGAATCTTACTTGGATTTGTACTGAGGAGAAGCCCAGAGTTCTTAAAGTCACAGTTCCAAGTATTCCGCCCCTTGGCCTGGTAGTACAAGTTCATGGCTATGGATGCATGAGAGATAGGAGTATCAGGGTAGAAACAAGTGTGGCCACTCTGAATCATGCTGCAATCCACCTGAGAACATGCGTAGTTGATGTTGGCAATCAGAGTTGCGACGTC…
Cluster-38184.93568	669.79	773.16	500.68	40.66	34.05	71.82	2188.7	2413.41	1820.11	145.22	84.53	248.7	3.61812	1.46819e-31	8.84995e-30	up	K01188 beta-glucosidase [EC:3.2.1.21] | (RefSeq) beta-glucosidase 24-like (A)	beta-glucosidase 24-like [Phalaenopsis equestris]	RecName: Full=Furostanol glycoside 26-O-beta-glucosidase {ECO:0000303|PubMed:8766714}; Short=CsF26G {ECO:0000303|PubMed:8766714}; EC=3.2.1.186 {ECO:0000269|PubMed:8549824, ECO:0000269|PubMed:8766714}; AltName: Full=Protodioscin 26-O-beta-D-glucosidase; Flags: Precursor;	SubName: Full=Beta-glucosidase 12 {ECO:0000313|EMBL:PKA59460.1}; EC=3.2.1.21 {ECO:0000313|EMBL:PKA59460.1};	Beta-glucosidase, lactase phlorizinhydrolase, and related proteins	GO:0009507,chloroplast; GO:0004553,hydrolase activity, hydrolyzing O-glycosyl compounds; GO:0005975,carbohydrate metabolic process	Glycosyl hydrolase family 1	CTTCTTTATTAATTTGGCTATAATCATAAGGTTCAAACCAATTTGAGTTCAAAGTAATACCCACTTTTCCTTTTTGTTTTGCCTGATATTGAGTTTTGTAGAGGTTTGCTGCTTCTGCATGAGCTAAGAGCATATTATGAACAACTTGATAAGGTTCTTTAAGAGAATCTCCATTAGGGCAAAGATAATCTACTCCATTAATGTTCAAATCTGGAGTACAATGACCAGGGGCACTTGCTCCAGTGCCATATCCATATGAAGAAAATATAAATGGTTCATTCATGGTGATCCAATGCTTTACTTTTTTGCCAAATTCCTCAAAACATAGTTGTGCAAAGTTTTTGTAGTCCTCCACAATTTTTCGACTTAAAAAGCCTCCGTATTCATTTTCTAA
Cluster-38184.110105	429.02	448.11	481.73	35.13	35.99	36.63	5009.84	5106.04	6616.61	473	348	456.04	3.52899	0	0	up	K01188 beta-glucosidase [EC:3.2.1.21] | (RefSeq) beta-glucosidase 24-like (A)	beta-glucosidase 24-like [Phalaenopsis equestris]	RecName: Full=4-hydroxy-7-methoxy-3-oxo-3,4-dihydro-2H-1,4-benzoxazin-2-yl glucoside beta-D-glucosidase, chloroplastic; EC=3.2.1.182; AltName: Full=Beta-glucosidase; Short=ScGlu; EC=3.2.1.21; Flags: Precursor;	SubName: Full=Beta-glucosidase 24 {ECO:0000313|EMBL:PKA52124.1}; EC=3.2.1.21 {ECO:0000313|EMBL:PKA52124.1};	Beta-glucosidase, lactase phlorizinhydrolase, and related proteins	GO:0009507,chloroplast; GO:0008422,beta-glucosidase activity; GO:0102726,DIMBOA glucoside beta-D-glucosidase activity; GO:0102483,scopolin beta-glucosidase activity; GO:0005975,carbohydrate metabolic process	Glycosyl hydrolase family 1	CAGTTCACCTCAAAAGAAAGAAAAACACAATATGGCTCTTTCAATAGTTAACACCCAGGTACCAACTTTGAGTTGGAAGAGGAAGAGCTTGGCCAATAACTCCCAGTTAGGAAAGCCTTATAGGATTTCTCCAATTCCTTCTCCCATTTCTCCAACTGGTTCAAAACCTTGTAATGCTCTTCAAGCCAAAGCTCAAATAAGCACAGATAAAATTGCATTATATGAGGGTGAATTTGATAAGCCTTATAAAAGCTTCCCTCCAGACTTTGCTTTTGGTGCTGCTAGTTCTAATATTCAGGTGGAAGGAGGAACAAAAGCTGGAGGGAAAGGACCTAACATATGGGATACCTTTTGTGAAAAATATCCAGAAAAAATTATTGATGGATCAAGTACAGAACC…
Cluster-38184.123989	194.43	178.05	248.52	22.27	16.79	17.02	1609.39	1433.27	2397.77	210.72	113.47	150.03	3.34249	6.2556e-75	1.33749e-72	up	K01188 beta-glucosidase [EC:3.2.1.21] | (RefSeq) beta-glucosidase 24-like (A)	beta-glucosidase 24-like [Phalaenopsis equestris]	RecName: Full=4-hydroxy-7-methoxy-3-oxo-3,4-dihydro-2H-1,4-benzoxazin-2-yl glucoside beta-D-glucosidase 1c, chloroplastic; EC=3.2.1.182; AltName: Full=Beta-glucosidase 1c; Short=Taglu1c; EC=3.2.1.21; Flags: Precursor;	SubName: Full=Beta-glucosidase 12 {ECO:0000313|EMBL:PKA59460.1}; EC=3.2.1.21 {ECO:0000313|EMBL:PKA59460.1};	Beta-glucosidase, lactase phlorizinhydrolase, and related proteins	GO:0009507,chloroplast; GO:0008422,beta-glucosidase activity; GO:0102726,DIMBOA glucoside beta-D-glucosidase activity; GO:0102483,scopolin beta-glucosidase activity; GO:0005975,carbohydrate metabolic process	Glycosyl hydrolase family 1	GCTTTTGCTACAGTAATCCCGCATTTTGCTACGGTGATTCCGCCTTTTTGTCTATAGTTGGATTACATTTTTGTAATAATGAAGTTTGGAATGTTAAATATGTAAATACAAGGTGTTAGATGCTATGTAGGTTAAAAAAACCCAAAAATTTAATAACATAAGGAAATTAAATATTTTGTGATAAACATCAATTTACCATTTTCAGTGATGTAAATTGGTGGGTTGTTGTATCTTTGCTTTATGTAGAGAAGAAGTTTCGTCAAGCCTTTAGGATACACGTTTACCCAAGTGTCTGGCTCAGCCGGCCCGATGGGTATCCCGGCCCTGTCAACTAGACTCTCAACATATGAGTCCTGCTCGTTTGTCTTTGGTTTGTGAGCATAATCATAAGGTACGCCT…
Cluster-38184.21146	3.49	2.36	2.51	0.34	0.26	0.28	115.63	76.71	99.31	13.29	7.29	9.86	3.11993	7.73467e-15	1.56331e-13	up	K19891 glucan endo-1,3-beta-glucosidase 1/2/3 [EC:3.2.1.39] | (RefSeq) hypothetical protein (A)	glucan endo-1,3-beta-glucosidase 14-like [Phalaenopsis equestris]	RecName: Full=Glucan endo-1,3-beta-glucosidase 14; EC=3.2.1.39; AltName: Full=(1->3)-beta-glucan endohydrolase 14; Short=(1->3)-beta-glucanase 14; AltName: Full=Beta-1,3-endoglucanase 14; Short=Beta-1,3-glucanase 14; Flags: Precursor;	SubName: Full=Glucan endo-1,3-beta-glucosidase 14 {ECO:0000313|EMBL:PKU62361.1};	--	GO:0046658,anchored component of plasma membrane; GO:0005618,cell wall; GO:0005737,cytoplasm; GO:0005576,extracellular region; GO:0005634,nucleus; GO:0042973,glucan endo-1,3-beta-D-glucosidase activity; GO:0004553,hydrolase activity, hydrolyzing O-glycosyl compounds; GO:0030247,polysaccharide binding; GO:0005975,carbohydrate metabolic process; GO:0071555,cell wall organization; GO:0006952,defense…	Glycosyl hydrolases family 17	AAAAGACACTCATATAAATTTCTGAAATTTTATTGATACAGAATTCTTATAACTGATACAGCAACAATAAAATGATGATATCGAATTTAAAAATTATTTGATGTTGCTAACTTAAGATAATGAATATGAGAACATTGAAGTAAATACAACTACAAAATAAGTTAATACAGAACACTAATCTTGCTCTTTAGTGATTTTGGCTGCAACTGTATCAGAGAAAAATATTACAGAAATGTAGGACTAAATAATAATTTGTAGCCTTACCTAAAAAGAAGCACTATCCATAAACAAGTGCCTAGAACCAAAGAGGACCACAACCAACCTAGAGTAGAGAAATCCTTTAGAGAGTGGAATGCGGATGATGTATGCCAAGTTGAAAGACCAGAAAGCCCAATATCA…
Cluster-38184.198594	2	2.46	1.25	0.23	0	0.61	69.57	83.96	51.75	9.52	0	22.55	2.58649	0.00687708	0.0218806	up	K19892 glucan endo-1,3-beta-glucosidase 4 [EC:3.2.1.39] | (RefSeq) glucan endo-1,3-beta-glucosidase 4-like isoform X1 (A)	glucan endo-1,3-beta-glucosidase 4-like isoform X2 [Dendrobium catenatum]	RecName: Full=Glucan endo-1,3-beta-glucosidase 4; EC=3.2.1.39; AltName: Full=(1->3)-beta-glucan endohydrolase 4; Short=(1->3)-beta-glucanase 4; AltName: Full=Beta-1,3-endoglucanase 4; Short=Beta-1,3-glucanase 4; Flags: Precursor;	SubName: Full=Glucan endo-1,3-beta-glucosidase 4 {ECO:0000313|EMBL:PKU86638.1};	--	GO:0031225,anchored component of membrane; GO:0046658,anchored component of plasma membrane; GO:0005886,plasma membrane; GO:0042973,glucan endo-1,3-beta-D-glucosidase activity; GO:0004553,hydrolase activity, hydrolyzing O-glycosyl compounds; GO:0030247,polysaccharide binding; GO:0005975,carbohydrate metabolic process; GO:0006952,defense response	X8 domain	GTGCTTCCTGCAAATATGCATAAGCCATGGCTAGGGTCATTTGTTGTAATCATGGCCGTGTTGTCAAAGTTGCATGTTCCACCATTTGCTTGAGTCCTATGGTAATAATCATTGTACGCATAAGAAGCAACTGCAGAAAGATCGCCCGATTCATAACACGGCTGCCCCGGCTGGATTGAACTGCAGTTAGCCCCACCAGGTCCACAAGCCCAATCAAGTCCTTGACTCAAATCTATGGAGTTCGCACTCGAGTTAGCCACACAAAAAACACCAGACAACCCTGTTGGGATTGCGCCATTATCAGCCACACTTGCAAAATTTAGAGAATATACAGCCGTTTCATTTGGAAAGAATATGCCCCAGTTCTTCTCCGAAAAAGGCCCAGGTCTAAGATCTTCA…
Cluster-38184.111216	292.93	293.73	308.33	57.45	52.53	47.45	4979.81	4885.1	6208.04	1133.57	747.27	860.75	2.37326	2.05385e-168	1.589e-165	up	K01188 beta-glucosidase [EC:3.2.1.21] | (RefSeq) beta-glucosidase 24-like (A)	beta-glucosidase 24-like [Phalaenopsis equestris]	RecName: Full=Furostanol glycoside 26-O-beta-glucosidase {ECO:0000303|PubMed:8766714}; Short=CsF26G {ECO:0000303|PubMed:8766714}; EC=3.2.1.186 {ECO:0000269|PubMed:8549824, ECO:0000269|PubMed:8766714}; AltName: Full=Protodioscin 26-O-beta-D-glucosidase; Flags: Precursor;	SubName: Full=Beta-glucosidase 24 {ECO:0000313|EMBL:PKA54141.1}; EC=3.2.1.21 {ECO:0000313|EMBL:PKA54141.1};	Beta-glucosidase, lactase phlorizinhydrolase, and related proteins	GO:0009507,chloroplast; GO:0004553,hydrolase activity, hydrolyzing O-glycosyl compounds; GO:0005975,carbohydrate metabolic process	Glycosyl hydrolase family 1	AGCAGTCCGAACAGGCTTGTATAGCCAAACCACCATTCAAAGCTGTCTAATAGAGACCACACGAAGTATCCTTTCACATCGACTCCTTTACTCATTGCCTCCTCCATTTCATGAAGGTGAGAGGTTAGGAATTGTATCCGATATCTATCTTCAAGCGGCGGTGGGCTGTTCGGAGCATCAGTATTTTGATAAACCCCATTTTCAGTGATGTAAATCGGTGGGTTGTTGTATCCTTCCTTTATGTATAGAAGAAGTTTCTTCAATCCTCTTGGATACACGTATACCCAAGTGTCTGGCTCATGCGGTCCGATGTATCTCCCGTCCCTTTCATCTAGCATATCAACATATGAGTCCTCCACGTTTGTCTTTGGTTTGTGAGTAGAATTAAAAGGTATGCCT…
Cluster-38184.110108	282.87	287.83	256.25	51.03	49.22	59.84	3959.89	3937.1	4234.78	826.5	573.7	893.41	2.23697	3.26969e-136	1.7653e-133	up	K01188 beta-glucosidase [EC:3.2.1.21] | (RefSeq) beta-glucosidase 24-like (A)	beta-glucosidase 24-like [Phalaenopsis equestris]	RecName: Full=4-hydroxy-7-methoxy-3-oxo-3,4-dihydro-2H-1,4-benzoxazin-2-yl glucoside beta-D-glucosidase 1c, chloroplastic; EC=3.2.1.182; AltName: Full=Beta-glucosidase 1c; Short=Taglu1c; EC=3.2.1.21; Flags: Precursor;	SubName: Full=Beta-glucosidase 24 {ECO:0000313|EMBL:PKA52124.1}; EC=3.2.1.21 {ECO:0000313|EMBL:PKA52124.1};	Beta-glucosidase, lactase phlorizinhydrolase, and related proteins	GO:0009507,chloroplast; GO:0008422,beta-glucosidase activity; GO:0102726,DIMBOA glucoside beta-D-glucosidase activity; GO:0102483,scopolin beta-glucosidase activity; GO:0005975,carbohydrate metabolic process	Glycosyl hydrolase family 1	AGACTTTGCTTTTGGTGCTGCTAGTTCTAATATTCAGGTAGAAGGAGGAATAAAAGCTGGAGGGAAAGGACCAAGCTCATGGGATATCTTTTGTGAAAAATACCCAGAAAAAATTATGGATAGATCAAGTACAGAACCGGGAGCAAACTCGTACTACCAATATATAGATGATGTGAAAGCTTTAGCTGAGCTGGGCGTCAACTCATACAGATTCTCCATTTCTTGGTCAAGAGTACTCCCAAAGGGTCGTGGCGAGCCAAATATCGTAGGACTTGGTTACTACCACAAATTGATTGATGAGCTAATAAACCATGGAATTGAGCCCTTTGTTACAATATTCCATTGGGATGTTCCACAGGCATTAGAAGATGAATACGGAGGCTTTTTAAGTCGAAAAAT…
Cluster-38184.166046	16.24	17.54	17.33	2.95	3.06	4.17	471	499	599	100	75	129	2.19143	5.69537e-42	5.04622e-40	up	K19891 glucan endo-1,3-beta-glucosidase 1/2/3 [EC:3.2.1.39] | (RefSeq) glucan endo-1,3-beta-glucosidase 3 (A)	glucan endo-1,3-beta-glucosidase 11-like [Dendrobium catenatum]	RecName: Full=Glucan endo-1,3-beta-glucosidase 11; EC=3.2.1.39; AltName: Full=(1->3)-beta-glucan endohydrolase 11; Short=(1->3)-beta-glucanase 11; AltName: Full=Beta-1,3-endoglucanase 11; Short=Beta-1,3-glucanase 11; Flags: Precursor;	SubName: Full=Glucan endo-1,3-beta-glucosidase 11 {ECO:0000313|EMBL:PKU73239.1};	--	GO:0031225,anchored component of membrane; GO:0046658,anchored component of plasma membrane; GO:0005576,extracellular region; GO:0009505,plant-type cell wall; GO:0005886,plasma membrane; GO:0042973,glucan endo-1,3-beta-D-glucosidase activity; GO:0030247,polysaccharide binding; GO:0005975,carbohydrate metabolic process; GO:0007154,cell communication; GO:0071555,cell wall organization; GO:0006952,d…	Glycosyl hydrolases family 17	TTTTTGAACCAGTAAAAAATTGGCCATAACTATTAACTATTTATTACTTGAAGGGTCCTTATTTGAATTAAAGGAATTATTCGTAGCTAACAATAAATAATTACTATTACAAAAAATTATTTAGAAATAAAATACCACCCCTTCCCAACCGAGAAAACACGTTCAGTCCGGCATTCAGATTAGTACAAGGAGAACATCGCCGCCGCCATGCTCGCCGTCGCCGCCGCTATCGCTCGCCGGAGCCACCTCCCCGTCGCCGACGATATATCATAATACCCCGACGAAGCGTCACCATTCCCGCCACCACCTCCAATTCCTTGCCCTCCTCCTCCGCCGCCGTCGCCGCCACCACCATGACCGCCGCTGGATGGCGAGCCAGTTGAGTTTTCCGGTGGAACT…
Cluster-33039.0	6.73	7.61	6.27	1.17	2.39	1.67	74.01	81.62	81.03	14.87	21.75	19.54	1.85466	2.39753e-07	1.85337e-06	up	K19891 glucan endo-1,3-beta-glucosidase 1/2/3 [EC:3.2.1.39] | (RefSeq) glucan endo-1,3-beta-glucosidase 1-like (A)	glucan endo-1,3-beta-D-glucosidase-like [Dendrobium catenatum]	RecName: Full=Glucan endo-1,3-beta-D-glucosidase; EC=3.2.1.39; AltName: Full=Major pollen allergen Ole e 9; AltName: Allergen=Ole e 9; Flags: Precursor;	SubName: Full=Glucan endo-1,3-beta-D-glucosidase {ECO:0000313|EMBL:PKU85662.1};	--	GO:0005576,extracellular region; GO:0042973,glucan endo-1,3-beta-D-glucosidase activity; GO:0042803,protein homodimerization activity; GO:0006076,(1->3)-beta-D-glucan catabolic process	X8 domain	ATCTTATATCCTGAAGATAAATATCAAAATTTAAATATCCTCTAAATAAATAACTAAAAATTTTATGTCCTATATAGATTCCCCTACATTATTTCATCAGTTTCATGGCAGATTAACTACACTTTTTCTTTAGTTAAAAATAAGGGAAATTTACATAGCACACAAAACAGCTACGAACAAGCAAATGTAGGATTCGATCGAATCGCTTTGTTTCGAAATGGGTGGGGAAACTCTCCCTACTGTAGAAATCAAACATAAGAACAGTTGCCATAACTTGGATTTGTACTGAGGAGAAGCCCAGAGTTCTTAAAGTCACAGTTCCAAGTATTCCGCCCCTTGGCCTGGTAGTACAAGTTCATGGCTATGGATGCATGAGAGATAGGAGTATCAGGGTAGAAA…
Cluster-38184.142899	21.5	22.69	20.07	6.75	6.23	3.51	860	891	959	316	211.22	149.99	1.8206	4.43483e-13	7.40085e-12	up	K19891 glucan endo-1,3-beta-glucosidase 1/2/3 [EC:3.2.1.39] | (RefSeq) hypothetical protein (A)	glucan endo-1,3-beta-glucosidase 3-like [Dendrobium catenatum]	RecName: Full=Glucan endo-1,3-beta-glucosidase 3; EC=3.2.1.39; AltName: Full=(1->3)-beta-glucan endohydrolase 3; Short=(1->3)-beta-glucanase 3; AltName: Full=Beta-1,3-endoglucanase 3; Short=Beta-1,3-glucanase 3; Flags: Precursor;	SubName: Full=Glucan endo-1,3-beta-glucosidase 3 {ECO:0000313|EMBL:PKU84974.1};	--	GO:0031225,anchored component of membrane; GO:0046658,anchored component of plasma membrane; GO:0005886,plasma membrane; GO:0042973,glucan endo-1,3-beta-D-glucosidase activity; GO:0004553,hydrolase activity, hydrolyzing O-glycosyl compounds; GO:0030247,polysaccharide binding; GO:0005975,carbohydrate metabolic process; GO:0006952,defense response	X8 domain	AAGAGATTCCCTCATAAAACTTTATAACATTTTATGTATATTTTAAATAAACAATCACATGACAAGAATAAACTCACCAATCATATAAATTTGCAACATAAACTATATCATGAAAATAAATTTAATAATAACTACTAATATATACATAAGCGAAGACTAGATTCAGCTAATCAAAGGTTACAAATTTATATAAAATAAAACTAAGATAAAACCATGAGACAACAATAAGGACACTGACTAATTAATTCCCAAAGCATGACTAGCTATTTAACTATTAATAAAAATATTAAAAAAACAAAAATTGGTATCTATATATAAAATATTGGCAGAAATAAAGAGTAAAGAGATCCAACATTCCTCTTTCTCTATATATCTTTCATCAGCATCTTCTCCGGCGAA…
Cluster-38184.130785	8962.09	8786.24	10576.2	3081.04	3228.14	2523.97	108856	104169	151228	43184.3	32508.9	32688.6	1.55076	2.88326e-31	1.71049e-29	up	K01188 beta-glucosidase [EC:3.2.1.21] | (RefSeq) beta-glucosidase 24-like (A)	beta-glucosidase 24-like [Phalaenopsis equestris]	RecName: Full=Furostanol glycoside 26-O-beta-glucosidase {ECO:0000303|PubMed:8766714}; Short=CsF26G {ECO:0000303|PubMed:8766714}; EC=3.2.1.186 {ECO:0000269|PubMed:8549824, ECO:0000269|PubMed:8766714}; AltName: Full=Protodioscin 26-O-beta-D-glucosidase; Flags: Precursor;	SubName: Full=Beta-glucosidase 12 {ECO:0000313|EMBL:PKA59460.1}; EC=3.2.1.21 {ECO:0000313|EMBL:PKA59460.1};	Beta-glucosidase, lactase phlorizinhydrolase, and related proteins	GO:0009507,chloroplast; GO:0004553,hydrolase activity, hydrolyzing O-glycosyl compounds; GO:0005975,carbohydrate metabolic process	Glycosyl hydrolase family 1	TCATAGGTAGAGGATTGCACATCATATAGTATATATGATATGGCCTTCATGATAGCCTCACCCATTGCTAGACGGCTGCAGACACAAGTGGGGCCTCCTCCTTTACGACTTGAACCGGAAGAGCCTTCTGCTGGTTTATATTCTTTAGGAATCGTGTGAGCCAACGTGAGGAGTTCTTCGGAACCCTAGACAGATCTGATTCACCGTAGTTGACGAAGATCAGACCAAACCGGCTTGAATAGCCATCGCCCCATTCAAAGCTGTCTAGAAGTGACCACATGAAGTATCCTCTCACATCAGCTCTTTGACTTATTGCATCCTCAACTTCATGAAGGTGAGCAGTATGGTACTCTTGTCGGACTATATCATCAAGCGGTCCAGGTAAATTATCTACGGGGA…
Cluster-38184.130783	2913.71	2950.41	3141.57	1088.48	970.28	932.23	3385.97	3139.16	3703.24	1261.99	747.69	1135.66	1.53911	3.76957e-74	7.87997e-72	up	K01188 beta-glucosidase [EC:3.2.1.21] | (RefSeq) cyanogenic beta-glucosidase-like (A)	cyanogenic beta-glucosidase-like [Phalaenopsis equestris]	RecName: Full=Cyanogenic beta-glucosidase; EC=3.2.1.21; AltName: Full=Linamarase; Flags: Precursor; Fragment;	SubName: Full=Raucaffricine-O-beta-D-glucosidase-like protein {ECO:0000313|EMBL:AAL27856.1}; Flags: Fragment;	Beta-glucosidase, lactase phlorizinhydrolase, and related proteins	GO:0008422,beta-glucosidase activity; GO:0102483,scopolin beta-glucosidase activity; GO:0005975,carbohydrate metabolic process	Glycosyl hydrolase family 1	AGGTTCATTCATGGTGATCCAATGCTTCACTCTATCACCAAATTTGTTAAAGCATAGGTCTACATAGTTCTTGTAGTCCTCCACTATTTTTCGACCTACAAAGCCTCCATATTCATCTTCTAAAGCCTGTGGAGTGTCCCAATGAAATAATGTAACATACGGCTCAATTCCATTGCTTAGTAGCTCATCAATCAATTTATTGTAGTACGCAATTCCTGCCGCATTTGGTTCACCACGGCCCTTTGGGAGTACTCTTGACCACGCAATGGAGAATCTGTATGCTTTGAGGCCAATATCA
Cluster-38184.105880	10.57	11.32	11.89	4.18	3.7	3.75	442.81	465.31	594.88	204.87	131.39	167.85	1.39907	1.08249e-28	5.69283e-27	up	K19891 glucan endo-1,3-beta-glucosidase 1/2/3 [EC:3.2.1.39] | (RefSeq) glucan endo-1,3-beta-glucosidase 3 (A)	glucan endo-1,3-beta-glucosidase 13 [Phalaenopsis equestris]	RecName: Full=Glucan endo-1,3-beta-glucosidase 13; EC=3.2.1.39; AltName: Full=(1->3)-beta-glucan endohydrolase 13; Short=(1->3)-beta-glucanase 13; AltName: Full=Beta-1,3-endoglucanase 13; Short=Beta-1,3-glucanase 13; Flags: Precursor;	SubName: Full=Glucan endo-1,3-beta-glucosidase 13 {ECO:0000313|EMBL:PKU66975.1};	--	GO:0031225,anchored component of membrane; GO:0046658,anchored component of plasma membrane; GO:0005576,extracellular region; GO:0009505,plant-type cell wall; GO:0005886,plasma membrane; GO:0042973,glucan endo-1,3-beta-D-glucosidase activity; GO:0004553,hydrolase activity, hydrolyzing O-glycosyl compounds; GO:0030247,polysaccharide binding; GO:0005975,carbohydrate metabolic process; GO:0071555,ce…	X8 domain	TCTGAATAAGGGGGCAGATGTTTCTCTGTCCTCGGGTAAAAAAATCTCCCCTAAACACAGTTTTGATGAATCCCCTAGGGGTCCGCACTCCACTGTCCTGTCGGTCGTGCGCTCAGCTGCAACAGCGTCCAGCTATTCGTCCTTATGCGCTCCCCGCTCTGCAATCTGACCCCATGAGCTCGAGTTCCCAGGAGACCAGTCGCACTAACGGATAGCTCTGGTTTTCAAAGGCGAAGAAGAGAAAGAACGGTGCCATTTTGGCGAATTCTTCTTCAAGAGCCAAGCAAGCGTGCTTCCCTGCCTTCATTGATGGTTAATAGAAGACGACTCCTTCAGCTGATTCCTCTGCTTGCCATTTCCCTTCTCGTCGAGCTCTGTAATGGAGGAAAGGTTGGTGTT…
Cluster-38184.109690	4724.62	4958.43	5800.09	1935.72	1926.49	1890.38	1124	983	1197	397	257	467	1.39655	2.52053e-22	9.25419e-21	up	K01188 beta-glucosidase [EC:3.2.1.21] | (RefSeq) beta-glucosidase 24-like (A)	beta-glucosidase 24-like [Phalaenopsis equestris]	RecName: Full=Furostanol glycoside 26-O-beta-glucosidase {ECO:0000303|PubMed:8766714}; Short=CsF26G {ECO:0000303|PubMed:8766714}; EC=3.2.1.186 {ECO:0000269|PubMed:8549824, ECO:0000269|PubMed:8766714}; AltName: Full=Protodioscin 26-O-beta-D-glucosidase; Flags: Precursor;	SubName: Full=Beta-glucosidase 24 {ECO:0000313|EMBL:PKA54141.1}; EC=3.2.1.21 {ECO:0000313|EMBL:PKA54141.1};	Beta-glucosidase, lactase phlorizinhydrolase, and related proteins	GO:0009507,chloroplast; GO:0004553,hydrolase activity, hydrolyzing O-glycosyl compounds; GO:0005975,carbohydrate metabolic process	Glycosyl hydrolase family 1	CACAACAAAGAGCTCTTGATTTCAACTTTGGATGGTTCATGGATCCATTGAAGTTCGGGAAATACCCATTTTCTATGAGAGCTTTGGTGAGGGATAGGCTCCCAGTTTTTACGCCTGAGGAGTCTGCAAAGCTTATAGACTCTTTTGACTTCCTTGGACTCAACTATTACACAGAAAAATATGTAAAAGACGCTCCTTTTAATTATGATGACCAACCAAAGACAGTCTTG
Cluster-38184.73286	8.15	8.2	6.35	2.26	2.76	3.23	48	46.69	43	15	13	20.21	1.35417	0.000387173	0.00170106	up	K19893 glucan endo-1,3-beta-glucosidase 5/6 [EC:3.2.1.39] | (RefSeq) glucan endo-1,3-beta-glucosidase 6-like (A)	Glucan endo-1,3-beta-glucosidase 8 [Apostasia shenzhenica]	RecName: Full=Glucan endo-1,3-beta-glucosidase 8; EC=3.2.1.39; AltName: Full=(1->3)-beta-glucan endohydrolase 8; Short=(1->3)-beta-glucanase 8; AltName: Full=Beta-1,3-endoglucanase 8; Short=Beta-1,3-glucanase 8; Flags: Precursor;	SubName: Full=Glucan endo-1,3-beta-glucosidase 8 {ECO:0000313|EMBL:PKA66073.1}; EC=2.7.13.3 {ECO:0000313|EMBL:PKA66073.1};	--	GO:0031225,anchored component of membrane; GO:0046658,anchored component of plasma membrane; GO:0048046,apoplast; GO:0005618,cell wall; GO:0005886,plasma membrane; GO:0009506,plasmodesma; GO:0042973,glucan endo-1,3-beta-D-glucosidase activity; GO:0004553,hydrolase activity, hydrolyzing O-glycosyl compounds; GO:0030247,polysaccharide binding; GO:0005975,carbohydrate metabolic process; GO:0006952,d…	Glycosyl hydrolases family 17	GTTTAGTTCGAATATTTGGGAGGATAAGTTGGGAGTTGGGGGTATGATTGTGAAGAGGTATATATATATATATTAAAATAAACATAAATTATAAAAAATAATAATAAGAAAGTGAAGCTTTTTGATGTTGATGAAAACACCATGAAAGCGCTTGCTGGAAGTGATATTGAGGTCATGGTGGCGATTCCAAATAATATGCTTTTAACCATGAACGATTTTGATGCTGCAAAGACCTGGGTTGATAAAAATGTTTATCGGCATAATTTTGATGGAGGAGTCAATATCAAGTGAGTCTTTTTACTGTTTCCTGCTCTTTTTTTCTTGCGATTCTTCTTCCTGTTGGAGTTTTATTTCTGGTATAGTTAAAATCTTGGGGCCTTTTAGTATGTTTGCTTTTGT…
Cluster-38184.186666	10.2	13.52	13.55	4.09	4.92	4.73	100.94	130.33	157.14	46.43	40.07	49.86	1.32202	1.22055e-07	9.8768e-07	up	K15429 tRNA (guanine37-N1)-methyltransferase [EC:2.1.1.228] | (RefSeq) hypothetical protein (A)	glucan endo-1,3-beta-glucosidase 8-like [Dendrobium catenatum]	RecName: Full=Glucan endo-1,3-beta-glucosidase 8; EC=3.2.1.39; AltName: Full=(1->3)-beta-glucan endohydrolase 8; Short=(1->3)-beta-glucanase 8; AltName: Full=Beta-1,3-endoglucanase 8; Short=Beta-1,3-glucanase 8; Flags: Precursor;	SubName: Full=Glucan endo-1,3-beta-glucosidase 8 {ECO:0000313|EMBL:PKU78351.1};	--	GO:0031225,anchored component of membrane; GO:0046658,anchored component of plasma membrane; GO:0048046,apoplast; GO:0005618,cell wall; GO:0005886,plasma membrane; GO:0009506,plasmodesma; GO:0042973,glucan endo-1,3-beta-D-glucosidase activity; GO:0004553,hydrolase activity, hydrolyzing O-glycosyl compounds; GO:0030247,polysaccharide binding; GO:0005975,carbohydrate metabolic process; GO:0006952,d…	Glycosyl hydrolases family 17	TTTCTTTTGTGCAACATATGATAAAGAACTCAGTACCTTCAAGCTGAAAGCTAATTGAAAAATATCATTAAAATATCATCAAACTCTAATGTATACACTATCTACCATAACGTAATCACCAAAAATAATTAAAAAAAATGAAACAAATCATTTACGATCATCTAAAACATGAGAACAACAAGTGAAATCAACAAAAACATCACAAACAACGGAGAAACAGAAGCACAATAACTTGCAGGCGAATCAATCTGAATGATGAAACTACACTGATCCGTAGACCGATTCTGAGTAGTCACCATTCCAAGCCCCTGAAAGCCACAACTCAATTCATTCTGCCCCTGCGCCTGAAAATACATATTGAATGCATAAGAAGCATTTCCATTGGTATCCAAGCCATTA…
Cluster-38184.106582	2665.51	2843.31	3160.44	987.53	1260.07	1337.12	1292	1201	1424	439	365	675	1.23179	8.90952e-11	1.11698e-09	up	K01188 beta-glucosidase [EC:3.2.1.21] | (RefSeq) beta-glucosidase 12-like (A)	unnamed protein product, partial [Vitis vinifera]	RecName: Full=Raucaffricine-O-beta-D-glucosidase; Short=Raucaffricine beta-glucosidase; Short=RsRG; EC=3.2.1.125; AltName: Full=Vomilenine glucosyltransferase; Short=RsVGT; EC=2.4.1.219;	SubName: Full=Uncharacterized protein {ECO:0000313|EMBL:CBI24926.3};	Beta-glucosidase, lactase phlorizinhydrolase, and related proteins	GO:0050247,raucaffricine beta-glucosidase activity; GO:0050506,vomilenine glucosyltransferase activity; GO:0009821,alkaloid biosynthetic process; GO:0005975,carbohydrate metabolic process	Glycosyl hydrolase family 1	AGCATGCTTTCCAGTGCTATATCCATGTGTGCTAAACATCATAGGTTCATTGATGGTGATCCAATGCTTCACTCTATCACCAAATCTGTTAAAACATAAATCTGCATATTTCTTGTAGTCATCCACTATTTTTCGACTTAAAAAGCCTCCATATTCATCTTGTAAAGCCTGTGGAACATCCCAATGGAATAATGCAACATACGGCTCAATTCCATTGCTTAATAACTCATCAATCAATTTATTGTAGTACGCAAT
Cluster-38184.110776	4.11	3.14	3.82	1.89	1.63	0.78	171.25	128.52	190.41	92.21	57.59	34.69	1.21903	0.00118888	0.00466732	up	K19892 glucan endo-1,3-beta-glucosidase 4 [EC:3.2.1.39] | (RefSeq) glucan endo-1,3-beta-glucosidase 4-like (A)	glucan endo-1,3-beta-glucosidase 4-like [Dendrobium catenatum]	RecName: Full=Glucan endo-1,3-beta-glucosidase 4; EC=3.2.1.39; AltName: Full=(1->3)-beta-glucan endohydrolase 4; Short=(1->3)-beta-glucanase 4; AltName: Full=Beta-1,3-endoglucanase 4; Short=Beta-1,3-glucanase 4; Flags: Precursor;	SubName: Full=Glucan endo-1,3-beta-glucosidase 4 {ECO:0000313|EMBL:PKU82472.1};	--	GO:0031225,anchored component of membrane; GO:0046658,anchored component of plasma membrane; GO:0005886,plasma membrane; GO:0042973,glucan endo-1,3-beta-D-glucosidase activity; GO:0004553,hydrolase activity, hydrolyzing O-glycosyl compounds; GO:0030247,polysaccharide binding; GO:0005975,carbohydrate metabolic process; GO:0006952,defense response	X8 domain	TTGGCTTCTATCGTCCCAGCCTCCAACGATTGCAGCTTTTTACAGTATTCGCATGAGGGCTGAACTCTGTGAGCTCGGAGGCTTCCTAGGGTTTGTCTTCTACTATCTTACTTCCTGATATCCGACTTCTTCTTAGGAGAGCTGCATTCAGTTAAGTTCCACCCTATCTGAACATGTGTGAATTACATCCTGTATGTCGTCGTAGCCGGGCTGCAGTTTTAGAGGGTTCCAGCCAGTTGTTTGCTAGAATATGGAAAAGAAGTATTCTAGTAATTCTACTGCTTATCTTTCTGTTCTCAGATGTTTCAGGTTCATTTGTTGGGATTAACATTGGTACAGACATTTCGAATTTGCCATCAGCGTCAAACATAGTGTCCATCCTCCAAGCTCATAAGATCA…
Cluster-38184.110110	17.07	16.92	18.67	7.46	8.33	7.76	94.89	90.92	119.1	46.69	36.94	45.89	1.04706	4.59145e-06	2.90262e-05	up	K01188 beta-glucosidase [EC:3.2.1.21] | (RefSeq) beta-glucosidase 24-like (A)	beta-glucosidase 24-like [Phalaenopsis equestris]	RecName: Full=4-hydroxy-7-methoxy-3-oxo-3,4-dihydro-2H-1,4-benzoxazin-2-yl glucoside beta-D-glucosidase 1c, chloroplastic; EC=3.2.1.182; AltName: Full=Beta-glucosidase 1c; Short=Taglu1c; EC=3.2.1.21; Flags: Precursor;	SubName: Full=Beta-glucosidase 24 {ECO:0000313|EMBL:PKA54141.1}; EC=3.2.1.21 {ECO:0000313|EMBL:PKA54141.1};	Beta-glucosidase, lactase phlorizinhydrolase, and related proteins	GO:0009507,chloroplast; GO:0008422,beta-glucosidase activity; GO:0102726,DIMBOA glucoside beta-D-glucosidase activity; GO:0102483,scopolin beta-glucosidase activity; GO:0005975,carbohydrate metabolic process	Glycosyl hydrolase family 1	AGACTTTGCTTTTGGTGCTGCTAGTTCTAATATTCAGGTAGAAGGAGGAATAAAAGCTGGAGGGAAAGGACCAAGCTCATGGGATATCTTTTGTGAAAAATACCCAGAAAAAATTATGGATAGATCAAGTACAGAACCGGGAGCAAACTCGTACTACCAATATATAGATGATGTGAAAGCTTTAGCCGAGCTGGGCGTCAACTCATACAGATTCTCCATTTCTTGGTCAAGAGTACTCCCAAAGGGTCGTGGCGAGCCAAATATCGTAGGACTTGGTTACTACCACAAATTGATTGATGAGCTAATAAACCATGGAATCGAGCCCTTTGTTACACTATTCCATTGGGATGTTCCACAGGCATTAGAAGATGAATACGGAGGCTTTTTAAGTCGAAAAAT…

## Sheet: TSA
ID	T-injure-H-1_fpkm	T-injure-H-2_fpkm	T-injure-H-3_fpkm	T-normal-Q-1_fpkm	T-normal-Q-2_fpkm	T-normal-Q-3_fpkm	T-injure-H-1_count	T-injure-H-2_count	T-injure-H-3_count	T-normal-Q-1_count	T-normal-Q-2_count	T-normal-Q-3_count	log2FoldChange	pvalue	padj	regulated	KEGG	NR	Swissprot	Tremble	KOG	GO	Pfam	Sequence
Cluster-38184.103420	59.28	52.08	57.47	9.89	9.47	7.66	914.66	785.72	1048.63	176.9	122	126	2.51324	1.42458e-71	2.77685e-69	up	K01695 tryptophan synthase alpha chain [EC:4.2.1.20] | (RefSeq) tryptophan synthase alpha chain-like isoform X1 (A)	Tryptophan synthase alpha chain [Dendrobium catenatum]	RecName: Full=Tryptophan synthase alpha chain, chloroplastic; EC=4.2.1.20; AltName: Full=Indole-3-glycerol-phosphate lyase, chloroplastic; EC=4.1.2.8; AltName: Full=Protein TRYPTOPHAN-REQUIRING 3; Flags: Precursor;	SubName: Full=Tryptophan synthase alpha chain {ECO:0000313|EMBL:PKU65471.1};	Tryptophan synthase alpha chain	GO:0009507,chloroplast; GO:0009570,chloroplast stroma; GO:0033984,indole-3-glycerol-phosphate lyase activity; GO:0004834,tryptophan synthase activity; GO:0009851,auxin biosynthetic process; GO:0052544,defense response by callose deposition in cell wall; GO:0042742,defense response to bacterium; GO:0009630,gravitropism; GO:0009735,response to cytokinin; GO:0000162,tryptophan biosynthetic process	Tryptophan synthase alpha chain	AAATTATAAAAATTGATTTAAACTAAATTTTATATGGAATATTGCTTCATTTATATCTTTGTGATTATGTAAACTTAAAGAAGTGCTGAAATGTTTGTGGAATTTTTAGGTTTGGGTGATCATTTTCTTATGAGTTCACTTCAAATTCTACCTTATGTCATTTGTTGCTTCGAGAAGATCTGAGTTTATTCAATATTATCAAAGCCATTATAGATTATCATTATGTGAATTTGATATATCACTCAAAGGTAATGCTAGAGATTTAATAGTTCTTGTTCATGTAAGGATTGTGCATGCTCAGTGGAGGTTAGATGTGCAAATTAAACATTGTTGTTTCAAGATCATAGGATTGGTATTAATATAGCCAATAGTTGAGTGGAGATTACCTTTGCTAGCATT…
Cluster-38184.136314	5.58	3.44	2.71	0.68	0.99	0.64	54.99	33	31.31	7.72	8	6.73	2.19851	8.61312e-05	0.000434279	up	K01695 tryptophan synthase alpha chain [EC:4.2.1.20] | (RefSeq) tryptophan synthase alpha chain-like isoform X1 (A)	Tryptophan synthase alpha chain [Dendrobium catenatum]	RecName: Full=Tryptophan synthase alpha chain, chloroplastic; EC=4.2.1.20; AltName: Full=Indole-3-glycerol-phosphate lyase, chloroplastic; EC=4.1.2.8; AltName: Full=Protein TRYPTOPHAN-REQUIRING 3; Flags: Precursor;	SubName: Full=Tryptophan synthase alpha chain {ECO:0000313|EMBL:PKU65471.1};	Tryptophan synthase alpha chain	GO:0009507,chloroplast; GO:0009570,chloroplast stroma; GO:0033984,indole-3-glycerol-phosphate lyase activity; GO:0004834,tryptophan synthase activity; GO:0009851,auxin biosynthetic process; GO:0052544,defense response by callose deposition in cell wall; GO:0042742,defense response to bacterium; GO:0009630,gravitropism; GO:0009735,response to cytokinin; GO:0000162,tryptophan biosynthetic process	Tryptophan synthase alpha chain	CTCGGTCTTCATCGAACGCCGTGATGAGGCCGGAGAGGCATTTCTGATTTCTCGGTGGCGCCTCTCTCTCAATCAATTAATCAATCGCAGCCTTGCAATGCCGCCATCGCCGGCGAGGATGAGATCACGAAGCTTTGTTGGCCGATTGCAAGTAGCCGGTCAGGTATCTCCTCAGGGAGGAAAGTATTACAGTATGAGAAGCATCATCAAGTACCTGAATCACAGGACCATCTAAGATGGGATCAGAGTAAGGCAGGCCCAGTTCGATGAGATCTGCGCCGCAGGAGCTCAACAACTTCAATGCTTTCTCTGTTGTAGATAAATCAGGATCTCCAGCAGTGATGTAAGGTATGAATGCAACTTTTCTTTGTTTCTTCAAGCTTGAGAAGGTCTCTGAGA…
Cluster-38184.139029	335.16	337.59	234.58	44.31	31.73	54.81	2114.22	2063.43	1708.12	316.56	161	367.9	2.67102	4.0989e-30	2.30072e-28	up	K01695 tryptophan synthase alpha chain [EC:4.2.1.20] | (RefSeq) tryptophan synthase alpha chain-like isoform X1 (A)	tryptophan synthase alpha chain-like isoform X2 [Dendrobium catenatum]	RecName: Full=Tryptophan synthase alpha chain; EC=4.2.1.20; AltName: Full=Indole synthase; AltName: Full=Indole-3-glycerol-phosphate lyase; EC=4.1.2.8;	SubName: Full=Uncharacterized protein {ECO:0000313|EnsemblPlants:GSMUA_Achr10P08680_001};	Tryptophan synthase alpha chain	GO:0005737,cytoplasm; GO:0033984,indole-3-glycerol-phosphate lyase activity; GO:0004834,tryptophan synthase activity; GO:0009851,auxin biosynthetic process	Putative N-acetylmannosamine-6-phosphate epimerase	GTAAACGTCTCCAAGCGCTGTAATCCTTCTTCAGAGGATTTACTCTCTCCTAATTCTTTAACAATAGCACTGCCCACAATCACACCATTTGCTCCCCATATTGACAACTGCTTTACGTGTTCTGGTTTTGATATTCCAAATCCAACTGCTATGGGTTTTGAGGTTTTCTTTTTAAGTTCTTCCAATCGAACTTGCACTTGAGGATTCAAATTTGAGCGTGCACCTGTGACTCCACTTGTGCTAACAAGGTACAAAAAACCATCTGTTGCATCAAGGACGACTTCCATTTGTTGTTTTGAAGTAGTTGGCGCGGCTAGCAAGACCAAATCAATATTCTTCCTGTTAGCTTTCTTCTTTAAACTCATGACGTCTTCAAAAGGAAGGTCTGGTACAATAAGT…
Cluster-38184.171387	2.95	2.18	1.66	0.26	0	0.06	53.78	38.96	35.88	5.44	0	1.1	4.32081	4.679e-07	3.46497e-06	up	K01695 tryptophan synthase alpha chain [EC:4.2.1.20] | (RefSeq) tryptophan synthase alpha chain-like isoform X1 (A)	tryptophan synthase alpha chain-like isoform X1 [Phalaenopsis equestris]	RecName: Full=Tryptophan synthase alpha chain; EC=4.2.1.20; AltName: Full=Indole synthase; AltName: Full=Indole-3-glycerol-phosphate lyase; EC=4.1.2.8;	SubName: Full=Indole-3-glycerol phosphate lyase, chloroplastic {ECO:0000313|EMBL:JAT56291.1};	Tryptophan synthase alpha chain	GO:0005737,cytoplasm; GO:0033984,indole-3-glycerol-phosphate lyase activity; GO:0004834,tryptophan synthase activity; GO:0009851,auxin biosynthetic process	Tryptophan synthase alpha chain	AGTGCAGCAGTTAAGGATTTTGTAAACGTCTCCAAGCGCTGTAATCCTTCTTCAGAGGATTTACTCTCTCCTAATTCTTTAACAATAGCACTGCCCACAATCACACCATTTGCTCCCCATATTGACAACTGCAAAATTTATTGAATCTTATGCAAAAGCTAATGTTGGAAATATAAAAGGTATAATTATTTCATTCAAAAGCATATGCAAACCTGCTTTACGTGTTCTGGTTTTGATATTCCAAATCCAACTGCTATGGGTTTTGAGGTTTTCTGAGAAGTGTGGATGACACATTAGATCCTCTATTCCATTACACTTTAAACTTATTATATGACATTCTAGTGCATAAACTCTTATTAGAATCCAGTTTAAAGTTGACTGATTTTTAAAATAAAGTGA…
Cluster-38184.55751	69.64	56.61	128.2	13.15	18.12	3.13	273	213	566	57	55	13	2.79917	2.52119e-06	1.66682e-05	up	K01695 tryptophan synthase alpha chain [EC:4.2.1.20] | (RefSeq) tryptophan synthase alpha chain-like isoform X1 (A)	tryptophan synthase alpha chain-like isoform X1 [Dendrobium catenatum]	RecName: Full=Tryptophan synthase alpha chain; EC=4.2.1.20; AltName: Full=Indole synthase; AltName: Full=Indole-3-glycerol-phosphate lyase; EC=4.1.2.8;	SubName: Full=tryptophan synthase alpha chain-like {ECO:0000313|RefSeq:XP_008779313.1};	Tryptophan synthase alpha chain	GO:0005737,cytoplasm; GO:0033984,indole-3-glycerol-phosphate lyase activity; GO:0004834,tryptophan synthase activity; GO:0009851,auxin biosynthetic process	Thiazole biosynthesis protein ThiG	TTGCTTGCCACACCAACTACTACAAAACATCGAATGAAAGTCATTCTTGATGCAACAGATGGTTTTTTGTACCTTGTTAGCACAAATGGAGTCACAGGTTTGCGCTCAAATTTGAATCCACAAGTGCAAGTTCGATTGGAAGAACTTAAAAAGGAAACCTCGAAACCCATCGCAGTTGGATTTGGAATATCAAAACCAGAACACGTAAACCAGCTATCAATATGGGGAGCAAATGGTGTGATTGTGGGCAGTGCTATTGTTAAGCTATTAGGAGAGAGTAAATCCTCTGAAGAAGGATTAAGGCGCTTGGAGACATTTACAAAATCCTTAATTTCTGCATTACCTTGAAGACCAAGTCAATCAACTTATATGTTATTTTTAGTTATTTTTTGTAGTTAT…

## Sheet: IGPS
ID	T-injure-H-1_fpkm	T-injure-H-2_fpkm	T-injure-H-3_fpkm	T-normal-Q-1_fpkm	T-normal-Q-2_fpkm	T-normal-Q-3_fpkm	T-injure-H-1_count	T-injure-H-2_count	T-injure-H-3_count	T-normal-Q-1_count	T-normal-Q-2_count	T-normal-Q-3_count	log2FoldChange	pvalue	padj	regulated	KEGG	NR	Swissprot	Tremble	KOG	GO	Pfam	Sequence
Cluster-38184.112687	79.79	55.7	74.13	25.56	26.64	32.62	2319.96	1588.11	2568.74	867.75	654.24	1012.72	1.17144	1.90146e-12	2.96113e-11	up	K01609 indole-3-glycerol phosphate synthase [EC:4.1.1.48] | (RefSeq) indole-3-glycerol phosphate synthase, chloroplastic-like isoform X1 (A)	indole-3-glycerol phosphate synthase, chloroplastic-like isoform X2 [Dendrobium catenatum]	RecName: Full=Indole-3-glycerol phosphate synthase, chloroplastic {ECO:0000303|PubMed:7610197}; Short=IGPS {ECO:0000303|PubMed:7610197}; EC=4.1.1.48 {ECO:0000269|PubMed:7610197}; Flags: Precursor;	SubName: Full=Ribosome production factor 2 like {ECO:0000313|EMBL:PKA49153.1}; EC=4.1.1.48 {ECO:0000313|EMBL:PKA49153.1};	Anthranilate synthase component II	GO:0009507,chloroplast; GO:0009570,chloroplast stroma; GO:0005829,cytosol; GO:0005507,copper ion binding; GO:0004425,indole-3-glycerol-phosphate synthase activity; GO:0000162,tryptophan biosynthetic process	Histidine biosynthesis protein	AAGTATCAACGTTATCCAAATGATTATAAAAATAGTAGATCTTTGTAAAATGCTTCACTCATCTGAAGTTGTTGTTCTCACAGGAATCCACCGAGGAAGCGGTAAGGAAATTATTTAGCAAAGATTACATTGCCAATTATGTTGAAGTCGGAGAGTGGGAAAGTGGAAAGTCTTTGGATACGATATTAGAAAATCAAGGCATCGTAATTAGAAGACGACCTCTGACTGGACCTCCTGCACACACTGTGGGACCCTTTGAATTTCGATTAGAGAATGATGGAAATACACCTCGCAACATTTTGGAGAAAATTATTTGGGACAAGGACGTTGAAGTTGCACGGTTAAAAGAGAGAAAGCCGTTAAGCATGATCAACGAAGATCTTAAGAATGCTCCTCCTG…

## Sheet: PAI
ID	T-injure-H-1_fpkm	T-injure-H-2_fpkm	T-injure-H-3_fpkm	T-normal-Q-1_fpkm	T-normal-Q-2_fpkm	T-normal-Q-3_fpkm	T-injure-H-1_count	T-injure-H-2_count	T-injure-H-3_count	T-normal-Q-1_count	T-normal-Q-2_count	T-normal-Q-3_count	log2FoldChange	pvalue	padj	regulated	KEGG	NR	Swissprot	Tremble	KOG	GO	Pfam	Sequence
Cluster-38184.137190	2.39	4.04	2.49	0.43	0.18	0	115.11	191.17	143.45	24.52	7.24	0	3.70068	9.13605e-05	0.000458274	up	K01817 phosphoribosylanthranilate isomerase [EC:5.3.1.24] | (RefSeq) N-(5'-phosphoribosyl)anthranilate isomerase 1, chloroplastic isoform X1 (A)	N-(5'-phosphoribosyl)anthranilate isomerase 1, chloroplastic isoform X4 [Dendrobium catenatum]	RecName: Full=N-(5'-phosphoribosyl)anthranilate isomerase 1, chloroplastic; EC=5.3.1.24; Flags: Precursor;	SubName: Full=N-(5'-phosphoribosyl)anthranilate isomerase 1, chloroplastic {ECO:0000313|EMBL:PKU79291.1};	Phosphoribosylanthranilate isomerase	GO:0009507,chloroplast; GO:0004640,phosphoribosylanthranilate isomerase activity; GO:0000162,tryptophan biosynthetic process	N-(5'phosphoribosyl)anthranilate (PRA) isomerase	AAATAATCAGCCCATCGGCCCGCCGAGCCCGAACCCGACCTGCTCCACACTAGCGGGCGGGCATTAATTCCGGGGAAAAAAAAAAGATAGTAGCGAGGAAGAGAGCGAAGGTGATTGAGAGAGATTGAAAGCCAGCGATACTGGGAGAAATTTCTACTGAGAAAGGGCGGGCCGGAGGAGATCGCGATACGTCGGAGCGAGGCTTTAAGCCGCCGGTGAGTCCGTCGTCTTCTTCCTCAAGCTTGAAGGATTAGGCATCTATCACCACTGAGTTTGTCCTCTGGATCTAATTCATGGCATTTTCGGTCGCGCATTTTCCCTCCCATTTCCTCATGCAGGGCAGCTTCTATGGTATTCTTCTTGAAGATTCATGTCTTCCTTTTTACTCCTTCCTGTACC…
Cluster-38184.138823	6.16	2.79	6.54	0.62	1.37	2.33	273.67	121.91	347.46	32.02	51.77	110.49	1.71822	0.00158921	0.00604482	up	K01817 phosphoribosylanthranilate isomerase [EC:5.3.1.24] | (RefSeq) N-(5'-phosphoribosyl)anthranilate isomerase 1, chloroplastic isoform X1 (A)	N-(5'-phosphoribosyl)anthranilate isomerase 1, chloroplastic isoform X4 [Dendrobium catenatum]	RecName: Full=N-(5'-phosphoribosyl)anthranilate isomerase 1, chloroplastic; EC=5.3.1.24; Flags: Precursor;	SubName: Full=N-(5'-phosphoribosyl)anthranilate isomerase 1, chloroplastic {ECO:0000313|EMBL:PKU79291.1};	Phosphoribosylanthranilate isomerase	GO:0009507,chloroplast; GO:0004640,phosphoribosylanthranilate isomerase activity; GO:0000162,tryptophan biosynthetic process	N-(5'phosphoribosyl)anthranilate (PRA) isomerase	AAATAATCAGCCCATCGGCCCGCCGAGCCCGAACCCGACCTGCTCCACACTAGCGGGCGGGCATTAATTCCGGGGAAAAAAAAAAGATAGTAGCGAGGAAGAGAGCGAAGGTGATTGAGAGAGATTGAAAGCCAGCGATACTGGGAGAAATTTCTACTGAGAAAGGGCGGGCCGGAGGAGATCGCGATACGTCGGAGCGAGGCTTTAAGCCGCCGGTGAGTCCGTCGTCTTCTTCCTCAAGCTTGAAGGATTAGGCATCTATCACCACTGAGTTTGTCCTCTGGATCTAATTCATGGCATTTTCGGTCGCGCATTTTCCCTCCCATTTCCTCATGCAGGGCAGCTTCTATGTTTACCCCAGAAGGCAATTCAATTTACCCTCAAGAAGCATGCCCTGTG…

## Sheet: ASA
ID	T-injure-H-1_fpkm	T-injure-H-2_fpkm	T-injure-H-3_fpkm	T-normal-Q-1_fpkm	T-normal-Q-2_fpkm	T-normal-Q-3_fpkm	T-injure-H-1_count	T-injure-H-2_count	T-injure-H-3_count	T-normal-Q-1_count	T-normal-Q-2_count	T-normal-Q-3_count	log2FoldChange	pvalue	padj	regulated	KEGG	NR	Swissprot	Tremble	KOG	GO	Pfam	Sequence
Cluster-38184.203518	5.47	4.74	5.29	1.36	1.29	1.29	119.58	101.6	137.63	34.54	23.73	30.15	1.83798	2.0315e-13	3.54137e-12	up	K01657 anthranilate synthase component I [EC:4.1.3.27] | (RefSeq) anthranilate synthase alpha subunit 1, chloroplastic-like (A)	anthranilate synthase alpha subunit 1, chloroplastic-like [Phalaenopsis equestris]	RecName: Full=Anthranilate synthase alpha subunit 2, chloroplastic; Short=OsASA2; EC=4.1.3.27; Flags: Precursor;	SubName: Full=Anthranilate synthase alpha subunit 2 chloroplastic {ECO:0000313|EMBL:ONL96293.1};	Isochorismate synthase	GO:0005950,anthranilate synthase complex; GO:0009507,chloroplast; GO:0004049,anthranilate synthase activity; GO:0000162,tryptophan biosynthetic process	chorismate binding enzyme	ATGAAATACAGCAAATTCTTTATGTAAACTTCCATCCATTTCAGATGTATTCTACTCAGTATAAATAGAGAGTAGGCAGCTTTAGTTTGTTTTACGTACAATAAATGAGTGGATGTGATTAAGGTGTGTAGTTACAAATCAATGGTACAGATTAATCCAGGGGATAGCCCCATGTGCCACGGTTTTGTGCTGGGAGAGAGTGCTTCCACTAATGCTGTTTGCTACATATGTATTAGTTCCGTGTGCTTGTCATAGCATACCTAGAACTTCACAAAAGTGTTCTCAGCAAGATCAATGGCAAAGGCAAGAGCTGCAACCTTATTCTCACACTCTCTCTGCTCTTTATCAGGATTGCTATCTGCCACTATCCCAGCTCCAGCCTGCAGGTCAGCCACCCAT…
Cluster-38184.63640	0.91	1.13	0.47	0.05	0	0.1	28.18	34.32	17.2	1.63	0	3.15	3.88062	9.05432e-05	0.000454569	up	K01657 anthranilate synthase component I [EC:4.1.3.27] | (RefSeq) anthranilate synthase alpha subunit 1, chloroplastic-like (A)	anthranilate synthase alpha subunit 1, chloroplastic-like [Dendrobium catenatum]	RecName: Full=Anthranilate synthase alpha subunit 1, chloroplastic; EC=4.1.3.27; Flags: Precursor;	SubName: Full=Anthranilate synthase component I-1, chloroplastic {ECO:0000313|EMBL:PKU87365.1};	Isochorismate synthase	GO:0009507,chloroplast; GO:0004049,anthranilate synthase activity; GO:0000162,tryptophan biosynthetic process	Anthranilate synthase component I, N terminal region	CTTTGCTCCGTTCCGATTTGAGGCGACGGAAAATCAATGGAAACTCTAGGCATCTCAAGCATCTTCATCTCGCCGACGCTCCATCCCCTGTCTCGACCGTATGGCGGCCGCGCCATCGCCGTAAGGAGCTCCATTTCAACCTCCCGATGTTCCCTCCGCCAACATATTTTTCCTTCTTTTCCCTCCCGTAGACGCGCCCACCTTTTTCCTCCCTCTGCTCTTTTAGCTAACAAAGAAGAGGTAGCAAGGTTCGAAGAAGCTTCGAGGAATGGTGAAAACTTGGTGCCGCTCTATCAATGTATTTTCTGCGATCACTTGACACCCGTACTCGCCTACCGCTGCCTGGTAAGAGAGGATGAGAGAGAGGCACCCAGCTTCTTGTTCGAGTCGGTGGAGCAA…
Cluster-38184.74434	0.79	0.68	1.3	0.38	0.32	0.16	25.33	21.35	49.73	14.26	8.73	5.47	1.56384	0.0113871	0.0336638	up	K01658 anthranilate synthase component II [EC:4.1.3.27] | (RefSeq) anthranilate synthase beta subunit 2, chloroplastic-like isoform X1 (A)	anthranilate synthase beta subunit 2, chloroplastic-like isoform X2 [Dendrobium catenatum]	RecName: Full=Anthranilate synthase beta subunit 2, chloroplastic; Short=OsASB2; EC=4.1.3.27; AltName: Full=Anthranilate synthase, glutamine amidotransferase component 2-2; Flags: Precursor;	SubName: Full=Anthranilate synthase component II {ECO:0000313|EMBL:PKU79887.1};	Anthranilate synthase, beta chain	GO:0005950,anthranilate synthase complex; GO:0009507,chloroplast; GO:0004049,anthranilate synthase activity; GO:0006541,glutamine metabolic process; GO:0000162,tryptophan biosynthetic process	Peptidase C26	CTGAATCAGGTTAATCTAACTCATCTCCGCCGCCATGGCCGTTCCCCATTCTCTAGCACCTAACCGCCACCTTGTTCCAAAAACCCTCGCCGGCCACTTTACCCTCGCCGACGCCCGACGTGCATTTGTTCCGGCCTCCATCTTCTCCCAGAGGCGTAGAGACGGTTTTGTGGCATGGAGCAGGGGCCATTCGTTGTATTTGAGCTGCTCTGCTGTGAAATCAGTTGCTGGGGTTAGGGATCTTGACGCGGCCAAAGATGAGAAGCCGATCATTGTGATAGATAATTACGACAGCTTTACTTATAATCTTTGCCAGTATATAGGAGAGCTTGGAACTAACTTCAAGGTCTATCGTAATGATGAGCTCACTGTGGACGAAATACGAAGGATGAAACCAAG…

## Sheet: UGT
ID	T-injure-H-1_fpkm	T-injure-H-2_fpkm	T-injure-H-3_fpkm	T-normal-Q-1_fpkm	T-normal-Q-2_fpkm	T-normal-Q-3_fpkm	T-injure-H-1_count	T-injure-H-2_count	T-injure-H-3_count	T-normal-Q-1_count	T-normal-Q-2_count	T-normal-Q-3_count	log2FoldChange	pvalue	padj	regulated	KEGG	NR	Swissprot	Tremble	KOG	GO	Pfam	Sequence
Cluster-38184.119005	125.46	121.78	141.41	321.59	321.94	334.23	5407.27	5152.26	7283.95	16226.3	11771.6	15385.2	-1.46807	6.31895e-86	1.63521e-83	down	K08237 hydroquinone glucosyltransferase [EC:2.4.1.218] | (RefSeq) hydroquinone glucosyltransferase-like (A)	hydroquinone glucosyltransferase-like [Dendrobium catenatum]	RecName: Full=Hydroquinone glucosyltransferase; EC=2.4.1.218; AltName: Full=Arbutin synthase;	SubName: Full=Hydroquinone glucosyltransferase {ECO:0000313|EMBL:PKU75219.1};	UDP-glucuronosyl and UDP-glucosyl transferase	GO:0050505,hydroquinone glucosyltransferase activity; GO:0008152,metabolic process	UDP-glucoronosyl and UDP-glucosyl transferase	TAAATAAAAGGCCCTCCAAGCCAAGAGCTCAAGTTCTTATCAATTTTCTTATCTGCCTCCAGCCATGGAAGTCGCCGGATCCCGTCGGCCACATCTTGCTGTCCTCCCAACCCCAGGCATGGGCCACCTCTTCCCCCTCGCCGAACTCGCCAAAGTTCTCGTCCATCGCTACCACTTCACCGTCACCTTTATCACCTTCGCCGCCTCCGACAACAAAGCCACCCAAAACTTCCTCTCCACTCTTCCCTCCAGCATCACCTCCATCTCCCTTCCCTCAGTACCCCTCGACGACGTTCCCTACGACGCCACCATCGAAACACGAATGTCCATAGTCTCCATCCGCTCCCTGCCCGCCCTCCGCTCCGTCCTCCTCGACCTGCAATCCACCACCAATCTCGT…
Cluster-12505.0	5.73	6.93	6.39	0.65	0.98	1.11	159	188.57	211.41	21	23	33	2.67239	2.76124e-22	1.01033e-20	up	K22845 phlorizin synthase [EC:2.4.1.357] | (RefSeq) UDP-glycosyltransferase 88B1 isoform X1 (A)	UDP-glycosyltransferase 88B1 isoform X1 [Dendrobium catenatum]	RecName: Full=UDP-glycosyltransferase 88B1 {ECO:0000303|PubMed:15610349}; EC=2.4.1.- {ECO:0000305};	SubName: Full=Anthocyanidin 5,3-O-glucosyltransferase {ECO:0000313|EMBL:PKU64909.1};	UDP-glucuronosyl and UDP-glucosyl transferase	GO:0016758,transferase activity, transferring hexosyl groups; GO:0008152,metabolic process	UDP-glucoronosyl and UDP-glucosyl transferase	CTTTTCTCTACTTAATCATCACTTCCAGCCTCACAAAGTCTTCACTTCATTGGTCACTTCACCTCCTTAAACCTAACCTCTTTCCACCAACGAAATCAGAAATGAAGGAAACTCTGGTGCTCTACCCAGCTCCCGGAATGGGACACCTCGTCTCCATGGTGGAGTTCGGAAAGCTTTTCCTAAGCCACGGCTTTGCCGTTGCCGTCATCACCGTCAACTCCACCTACACAACCGGTGCAGCCAGCACCACAGCCACCTTCATCACCCGCATGTCCTCTGCCCACCCCTTCCTCTCCTTCCACAGGCTCCCTCACGTCTCCCTCCCACCAAATCCATCTCCTCACTATGAAGCTCACGCATTCGATCTGCTCCGCCTCTCCAACCCTCACCTCCTCTCTT…

## Sheet: CYP
ID	T-injure-H-1_fpkm	T-injure-H-2_fpkm	T-injure-H-3_fpkm	T-normal-Q-1_fpkm	T-normal-Q-2_fpkm	T-normal-Q-3_fpkm	T-injure-H-1_count	T-injure-H-2_count	T-injure-H-3_count	T-normal-Q-1_count	T-normal-Q-2_count	T-normal-Q-3_count	log2FoldChange	pvalue	padj	regulated	KEGG	NR	Swissprot	Tremble	KOG	GO	Pfam	Sequence
Cluster-38184.167146	43.11	43.74	39.44	0	0	0	1272.67	1266.4	1387.83	0	0	0	12.6093	1.35424e-26	6.26575e-25	up	K00327 NADPH-ferrihemoprotein reductase [EC:1.6.2.4] | (RefSeq) NADPH--cytochrome P450 reductase-like (A)	NADPH--cytochrome P450 reductase-like [Dendrobium catenatum]	RecName: Full=NADPH--cytochrome P450 reductase {ECO:0000255|HAMAP-Rule:MF_03212}; Short=CPR {ECO:0000255|HAMAP-Rule:MF_03212}; Short=P450R {ECO:0000255|HAMAP-Rule:MF_03212}; EC=1.6.2.4 {ECO:0000255|HAMAP-Rule:MF_03212};	SubName: Full=NADPH--cytochrome P450 reductase {ECO:0000313|EMBL:PKU69577.1};	NADP/FAD dependent oxidoreductase	GO:0005789,endoplasmic reticulum membrane; GO:0016021,integral component of membrane; GO:0010181,FMN binding; GO:0003958,NADPH-hemoprotein reductase activity	Oxidoreductase NAD-binding domain	AAAAGAGTCTGGTGCTGTACTTGGGCCTGCTATACACTTCTTTGGATGCAGGAATCGGAAAATGGATTTCATCTATGAAGATGAGCTGAAAAATTTTGTTGAAGCTGGAGTGATTTCGGAGCTGATTGTAGCGTTTTCTCGGGAGGGAGCAACAAAGGAGTATGTGCAACATAAAATGGTGGAAAAGGCATCTGAAATTTGGGATATTATCTCTAATGGTGGCTACATCTATGTGTGTGGTGATGCCAAAGGCATGGCTAAAGATGTCCACCGCACTCTTCATACCATAGTTCAGGAACAGGGCTCTCTAGATAGCTCAAAGACTGAAAGCCTGGTGAAGAACCTGCAAATGCAAGGAAGGTATCTGCGAGATGTCTGGTGATCATTCTTAGGGTTTTC…
Cluster-38184.135548	13.86	10.72	13.26	0	0	0	416.21	315.69	474.69	0	0	0	10.8981	7.96446e-20	2.45866e-18	up	K11868 indoleacetaldoxime dehydratase [EC:4.99.1.6] | (RefSeq) indoleacetaldoxime dehydratase-like (A)	Cytochrome P450 71A4 [Dendrobium catenatum]	RecName: Full=Cytochrome P450 71A1; EC=1.14.-.-; AltName: Full=ARP-2; AltName: Full=CYPLXXIA1;	SubName: Full=Cytochrome P450 71A4 {ECO:0000313|EMBL:PKU64505.1};	Cytochrome P450 CYP2 subfamily	GO:0005789,endoplasmic reticulum membrane; GO:0016021,integral component of membrane; GO:0031090,organelle membrane; GO:0020037,heme binding; GO:0005506,iron ion binding; GO:0004497,monooxygenase activity; GO:0016705,oxidoreductase activity, acting on paired donors, with incorporation or reduction of molecular oxygen; GO:0009835,fruit ripening	Cytochrome P450	CTTGATCTAATTTTACTCAAATTTTAGTCATCTTTGTCACATGGCCATAATGTGAATACATTTATTCAACCTAGTTGTCATGAAATCTTTATAAACCCCAACACTCACCTCTCCTCTCAAAACATACAAATCCTAAGAGAAGAAGAAAATAGTTATAGAGCTTCTTTTCTCTCCTCCAACTATGTCATTAATATTGGCTCTTACAATACTAGCAATTACTTTATCGTTTCTCTTCTTCTACAAGAAGAGCACCACTATCACTAATATTAATAGTATACACCCCCTCCCACCCTCTCCCCCTAAGCTCCCCATCATCGGCAACCTTCATCAACTTGGCTCTCTACCACATCGCTCCCTCCACCACCTCTCAAACCGTCATGGCTCCCTAATGCTCCTCCA…
Cluster-38184.131814	2.73	7.01	4.84	0	0	0	117.61	296.28	248.97	0	0	0	10.04	2.51878e-15	5.33256e-14	up	K09755 ferulate-5-hydroxylase [EC:1.14.-.-] | (RefSeq) cytochrome P450 84A1 (A)	cytochrome P450 84A1 [Dendrobium catenatum]	RecName: Full=Cytochrome P450 84A1; EC=1.14.-.-; AltName: Full=Ferulate-5-hydroxylase; Short=F5H;	SubName: Full=Cytochrome P450 84A1 {ECO:0000313|EMBL:PKU68221.1};	Cytochrome P450 CYP2 subfamily	GO:0005783,endoplasmic reticulum; GO:0016021,integral component of membrane; GO:0016020,membrane; GO:0020037,heme binding; GO:0005506,iron ion binding; GO:0004497,monooxygenase activity; GO:0016709,oxidoreductase activity, acting on paired donors, with incorporation or reduction of molecular oxygen, NAD(P)H as one donor, and incorporation of one atom of oxygen; GO:0009809,lignin biosynthetic proc…	Cytochrome P450	TTTTTTTGCCTTTTTAGCTATAATTTTATACTTTATAAATAATAATAAAATTTAGAATAATAAATATGTAAATATAAAGATTTTGCGTCGTCAACCCAAACACGTTCTCCATCGACAACTCCGACGGCTTCATTCCTTTCGGCAATTCCCACTCAAAGCAATGCAAGAGATTTGCGACGACAAGCTCAAGTGCATACAACCCCAGTTGCATCCTCGAACAAGATCTACGTCCGAAGAAGTTTCCACAGAAATCGACGGTGGCGTATGATCCATTCGGGGCCAAGCGGGAGGGTCAGAAGACATCAGTGTCTTTCCAGGCGAATTTGTTGCGGTTGATGGCTCATATGTTGATCATGACCCGGGTGCATGTGAGGATGAAGTAGTTGACGGCGGGAGAGT…
Cluster-38184.66456	6	5.19	5.18	0	0	0	169.42	143.91	174.23	0	0	0	9.59668	1.37755e-15	2.99391e-14	up	K13260 isoflavone/4'-methoxyisoflavone 2'-hydroxylase [EC:1.14.13.89 1.14.13.53] | (RefSeq) isoflavone 2'-hydroxylase-like (A)	isoflavone 2'-hydroxylase-like [Dendrobium catenatum]	RecName: Full=Cytochrome P450 81E8 {ECO:0000303|PubMed:14617078}; EC=1.14.13.- {ECO:0000305};	SubName: Full=Isoflavone 2'-hydroxylase {ECO:0000313|EMBL:PKU65919.1};	Cytochrome P450 CYP2 subfamily	GO:0016021,integral component of membrane; GO:0020037,heme binding; GO:0005506,iron ion binding; GO:0004497,monooxygenase activity; GO:0016705,oxidoreductase activity, acting on paired donors, with incorporation or reduction of molecular oxygen	Cytochrome P450	TGATTTTGTGCTGTATATATAATTAAAATTTAAGTGTAAAATATGTAAATACGAAATAATTTTGTGCTATATAGGTAACCGTAAAAGTCCCTATTTTTTATCCAACCAAATATTAAATTTTCAAAGCTTTCTGTTGGATATAATTACAAATAGAAAATAAAATTGCATCAAAAGTTCTTAATAAAAAATTTCAAGAGTGCAAAATATATACCTAAAATAGAAAAATAACCGTCCATATATATAAGATATTAAGATAAGATATTTAGAGGAGAATTATTTTATAATATAAATAACACAAAATTAGTTATAACTAAATAAAAAAAATATAATTAGTACTGACCACCACGATTCCTTTAATAATTTCATCCGTATACTGCTCCGGATGAAGTTTTTGCAGAG…
Cluster-38184.175128	1.62	2.03	0.89	0	0	0	85.49	105.5	56.13	0	0	0	8.64755	1.78585e-11	2.47363e-10	up	K15639 PHYB activation tagged suppressor 1 [EC:1.14.-.-] | (RefSeq) cytochrome P450 734A1 isoform X1 (A)	cytochrome P450 734A1-like [Dendrobium catenatum]	RecName: Full=Cytochrome P450 734A6; EC=1.14.-.-;	SubName: Full=Cytochrome P450 734A1 {ECO:0000313|EMBL:PKU69939.1};	Cytochrome P450 CYP4/CYP19/CYP26 subfamilies	GO:0016021,integral component of membrane; GO:0020037,heme binding; GO:0005506,iron ion binding; GO:0004497,monooxygenase activity; GO:0016705,oxidoreductase activity, acting on paired donors, with incorporation or reduction of molecular oxygen; GO:0010268,brassinosteroid homeostasis; GO:0016131,brassinosteroid metabolic process; GO:0040008,regulation of growth	Cytochrome P450	AGATGACGAGTGCCAGTTGACAGGATGTCAGATGTTAATTGTTGGCTGGCGTCGAGCGATAGCTAACAGGAATGTCAGTCGAATGGACAGTTGGCTTAGTCTTTTGTCCCCACGAGCCTTAGTGTATATCATATGCATTATGATCAACTCATTAGGTGATAACAAATAAGAGAGACCATGGAGGTCGACCACCCGCTGCCAACAAAAATCACCTCCAACAGAAATTGACCATCGACTCCCGATGGCAACCACCACCACTCGATGTTGACCATCTGCTCCCTACATTGACCACTAGCACCTGACGTCATCTACAAGCTATCTGTAGTGACTATTAGCAACTAAGACTGATCATTAGTCCCCGTACTTGACCACCAACACCGACAAAGACCACCAACGTCT…
Cluster-38184.68590	0.4	4.05	1.4	0	0	0	14.99	150.12	63.1	0	0	0	8.52535	4.70773e-08	4.06696e-07	up	K20769 fatty acid omega-hydroxylase [EC:1.14.-.-] | (RefSeq) cytochrome P450 94A2-like (A)	cytochrome P450 94B3-like [Dendrobium catenatum]	RecName: Full=Cytochrome P450 94A1; EC=1.14.-.-; AltName: Full=P450-dependent fatty acid omega-hydroxylase;	SubName: Full=Cytochrome P450 94A1 {ECO:0000313|EMBL:PKA53177.1};	Cytochrome P450 CYP4/CYP19/CYP26 subfamilies	GO:0005789,endoplasmic reticulum membrane; GO:0016021,integral component of membrane; GO:0020037,heme binding; GO:0005506,iron ion binding; GO:0004497,monooxygenase activity; GO:0016705,oxidoreductase activity, acting on paired donors, with incorporation or reduction of molecular oxygen	Cytochrome P450	GTGCGATCCTGCTGGGAAAAAATGGGAATCGATTGGGCTGCCCAAATCTCATCCCCCTTTCTCCTCATCCTCTTAACCTTCATCTCCTCCATTTCAATCTATCTACTCCTCTTCTTCTCATCCGAAAAGAAATTTCCCAGAAAAAACCCATTCTACCCGCCAGGATTGCAGCCCTACCCCATCATCGGCCACCTCCCCCAATTCCTCCGCCACCGCCACCGCTCCCTTGAGTGGTTGACGGAGCTCCTCGCCGCCTGTCCGACCAACACCTTGGTCTTCCACCGCCCCGGTGGTATCCGCGGCGTCATCACAGCAAATCCGGCCAACGTCGAGCACATGCTGAAATCTCACTTCGACAACTACCCTAAAGGCGATCGGTTCCGCTTCATTCTGAACGAT…
Cluster-38184.101136	0.27	1.4	1.15	0	0	0	10.97	56.64	56.44	0	0	0	7.60424	5.99126e-07	4.36694e-06	up	K20495 long-chain fatty acid omega-monooxygenase [EC:1.14.13.205] | (RefSeq) hypothetical protein (A)	Cytochrome P450 704C1 [Apostasia shenzhenica]	RecName: Full=Cytochrome P450 704C1; EC=1.14.-.-; AltName: Full=Cytochrome P450 CYPD;	SubName: Full=Cytochrome P450 704C1 {ECO:0000313|EMBL:PKA60456.1}; EC=1.14.-.- {ECO:0000313|EMBL:PKA60456.1};	Cytochrome P450 CYP4/CYP19/CYP26 subfamilies	GO:0016021,integral component of membrane; GO:0020037,heme binding; GO:0005506,iron ion binding; GO:0004497,monooxygenase activity; GO:0016705,oxidoreductase activity, acting on paired donors, with incorporation or reduction of molecular oxygen	Cytochrome P450	CGAATTTTAATTGAGCCAATCCTTAATCAATTATATTAAAATCTGTACGTATATATATATATATATACATATATTATTGCGAGCTAATAAATTTTTGTTAGTAGAAAAATTATACAACTATCTCAATATGAATACCCAACACATAAACAACTAGAGACGGAACTTTAAATGTAAAAAACCCTATAAAAGAAAAAAATGACTGAGCTTTGCCCAAAAAAAGTGATCCACTATATTTTGAAGTGTTACAAAACTCCACCTTCCTCCAATGTTAGATGTGATTTACAATGTATGGAAAGTCAGACAAAAGCAACCTGAAGAAAAAAACTAGGTTGGCTGTGACGACCGGTGGTGGTGATCATCGGTCGTCGGTGGTGAACGTTGGTGATGATCGTCGGTCTT…
Cluster-38184.233623	0.22	1.29	1.25	0	0	0	7.91	45.08	53.03	0	0	0	7.36638	4.08158e-06	2.60155e-05	up	K20495 long-chain fatty acid omega-monooxygenase [EC:1.14.13.205] | (RefSeq) cytochrome P450 family protein (A)	cytochrome P450 704C1-like isoform X2 [Dendrobium catenatum]	RecName: Full=Cytochrome P450 704C1; EC=1.14.-.-; AltName: Full=Cytochrome P450 CYPD;	SubName: Full=Cytochrome P450 704C1 {ECO:0000313|EMBL:PKU83737.1};	--	GO:0016021,integral component of membrane; GO:0020037,heme binding; GO:0005506,iron ion binding; GO:0004497,monooxygenase activity; GO:0016705,oxidoreductase activity, acting on paired donors, with incorporation or reduction of molecular oxygen	Cytochrome P450	GTGGTGGCAATTATATCCCGTCGTTGTGGTGGTGACTCCGAGTATCATTCCCTATTCAATCCATTGGGTGGTATGACTGTATCCCGGTAGGTTGTGGAAGATGGGATCCTATTTGTTTCTTGTATATTTTATTTTGGTTATTAAATCTTATATTATTTTCCGCTTCTACTTTTGTTTGATCCTTTCATTATTTTTCCTTATTTCTCCACCATAATTCATATCTTTATCCAAAAGAAATCCTACAAATCATTTGATCTGATTGCTACCAGATCTATGCCCTTGGTCTGATATTATTTGGTATCAGAGCCAACAAAATTTAAGATGTTACTTGGACTTCAATTTCGCCACAAAATTTCCAAAATTATTGAAAAAAATAATTCATCTCTAACATATTGAAAT…
Cluster-41215.0	1.47	0.88	0.56	0	0	0	46	27	21	0	0	0	7.2526	4.09134e-07	3.05177e-06	up	K13260 isoflavone/4'-methoxyisoflavone 2'-hydroxylase [EC:1.14.13.89 1.14.13.53] | (RefSeq) hypothetical protein (A)	hypothetical protein PHAVU_010G013100g [Phaseolus vulgaris]	RecName: Full=Cytochrome P450 81E8 {ECO:0000303|PubMed:14617078}; EC=1.14.13.- {ECO:0000305};	SubName: Full=Uncharacterized protein {ECO:0000313|EMBL:ESW06021.1};	Cytochrome P450 CYP2 subfamily	GO:0016021,integral component of membrane; GO:0020037,heme binding; GO:0005506,iron ion binding; GO:0004497,monooxygenase activity; GO:0016705,oxidoreductase activity, acting on paired donors, with incorporation or reduction of molecular oxygen	Cytochrome P450	CTAGTGTTTATCCCAAATGAAATGAGGGTGCATCTATTTTACAGTCAAAAAATATCTATTTAATTTTGCGCTGAAAGTTTATGATTATTTAAACAAATGGTAAATTCACATTCTGTCAGTTCATCAGATTAAAAATCATTTGATACACAAATATTAATATAAGAAACATGCAAGTTTAGTTGGAATTGGAAATTTTCTCAAAGATGAAAGTTGGTAAGTGAGATGGACGCCTTGATAAACCAAATATGGCTTCAGTCGAAATTTTAGCTCCTGGCTTAACTTTGACATGATATTTTTGTAACATACAAACTAAATACAAAAACAGTTCAACATTGGCTAAACTTTCACCTGGACAGTTCCTTTTACCAGCACCGAAAGTTATAAGATGCGATGGTTTCA…
Cluster-38184.166363	1.05	0	1.43	0	0	0	28.45	0	45.91	0	0	0	6.81228	0.0137485	0.0395446	up	K00512 steroid 17alpha-monooxygenase / 17alpha-hydroxyprogesterone deacetylase [EC:1.14.14.19 1.14.14.32] | (RefSeq) geraniol 8-hydroxylase-like (A)	geraniol 8-hydroxylase-like [Dendrobium catenatum]	RecName: Full=Ferruginol synthase {ECO:0000303|PubMed:23812755}; EC=1.14.13.190 {ECO:0000269|PubMed:23812755}; AltName: Full=Cytochrome P450 76AH1 {ECO:0000303|PubMed:23812755};	SubName: Full=Geraniol 8-hydroxylase {ECO:0000313|EMBL:PKU75491.1};	Cytochrome P450 CYP2 subfamily	GO:0005789,endoplasmic reticulum membrane; GO:0016021,integral component of membrane; GO:0020037,heme binding; GO:0005506,iron ion binding; GO:0004497,monooxygenase activity; GO:0016705,oxidoreductase activity, acting on paired donors, with incorporation or reduction of molecular oxygen	Cytochrome P450	ACATAGCACAAAATTCCTTTTGATTAACCTATTTCGCACACCAATTTTAACTTTTACATTTATAGCATAAAAATACCAGAAAAATCAAAATTTTAAAAAGTCAAAATTTTTTTTTTTGATATATACTTTTATGCTATAAATATAAAAATTAAAATTTATATGTGAAATATATAAATCCAAAAAAAAAATTGTGTCATGTATATAAAAACCCCAAATTAAAATTACCATAAGCAAGGCCTTAACATGAGTCATGGTGAAAGGTTCCTTACTCTCACCACCCTTCTCCTCCAACAGAAGCATGTAATCCAAAAAATCCATCTTTTCCTTCTCATTCTTCCCATCCTTCATCACCCCCTTTGATCTCTTCTTCATCTCTATAATCCTTCTAAAAATCCCATC…
Cluster-38184.16080	3.86	4.17	1.86	0	0	0.2	91.63	97.15	52.5	0	0	5.03	5.47308	9.64428e-09	9.21289e-08	up	K07408 cytochrome P450 family 1 subfamily A polypeptide 1 [EC:1.14.14.1] | (RefSeq) cytochrome P450 81E8-like (A)	cytochrome P450 81E8-like [Dendrobium catenatum]	RecName: Full=Cytochrome P450 81E8 {ECO:0000303|PubMed:14617078}; EC=1.14.13.- {ECO:0000305};	SubName: Full=Isoflavone 2'-hydroxylase {ECO:0000313|EMBL:PKU65918.1};	Cytochrome P450 CYP2 subfamily	GO:0016021,integral component of membrane; GO:0020037,heme binding; GO:0005506,iron ion binding; GO:0004497,monooxygenase activity; GO:0016705,oxidoreductase activity, acting on paired donors, with incorporation or reduction of molecular oxygen	Cytochrome P450	GTAGCCTCCCACCTTGCATTCTTCTAATGACTCATGAGGTGCGAGAAGAGGAGCTACAGGATACATTCGAAGCGTCTCGTTAATGACACAATGGAGATATGGAAGTTTGTCGAGATCTGATTCATCAAGTAGGCGACTGTTCTCTACATTCTCATCAATCTCTTCCCTAACCTTGGCAAGTTTTTCAGGATTGTTTAGTAAAAGAGACAGTGCCCATTCTATGGTGTTTGATGAAGTTTCTGTTCCTGCTGTTAACAATGTCGTAACAAGAGATTTGATGAAACGATCATCGTACTGTTCGGGATGGGTTCGTTGGAGCGATAAGAGGGCATCTATCATTGTTTTATGGTTCTTACGGTCTTCCTTTGCTAACTCCCCTGCTTCTACTTCTTCCAACTC…
Cluster-38184.25468	4.74	3.85	6.4	0.09	0.16	0.15	178	142	287	4	5	6	5.12977	6.59382e-26	2.93152e-24	up	K15402 fatty acid omega-hydroxylase [EC:1.14.-.-] | (RefSeq) cytochrome P450 86B1 (A)	cytochrome P450 86B1 [Dendrobium catenatum]	RecName: Full=Cytochrome P450 86B1; EC=1.14.-.-;	SubName: Full=Cytochrome P450 86B1 {ECO:0000313|EMBL:PKU61566.1};	Cytochrome P450 CYP4/CYP19/CYP26 subfamilies	GO:0005783,endoplasmic reticulum; GO:0005789,endoplasmic reticulum membrane; GO:0016021,integral component of membrane; GO:0020037,heme binding; GO:0005506,iron ion binding; GO:0004497,monooxygenase activity; GO:0016705,oxidoreductase activity, acting on paired donors, with incorporation or reduction of molecular oxygen; GO:0071555,cell wall organization; GO:0010345,suberin biosynthetic process; …	Cytochrome P450	TTTTATTTCTTCAAAGAAGCGCGCACACCTTGTCTTATTTTGTATTTATACTTTTAATTATACAAGTTTAAGCTGCTCCTCTTTCACTCGCTATCTTCACCCACGTTATTACAAATTTACCTCAGCACTACTTATGTTATGCAGAGATCGATCAGACATTCCGCAAACACGATTTATAATTAACAGGACAACCTTAATAAAAAGCTCATTAATTCCAGAAAGACCACTTCACATTCAATAATGCTGAAATGGCATCCTATCACTAGCCATCTGATCCAAGCTTATCCGTGCTCAGTTGCATTACTTCCTTGCCTCTACCGTCACTTTAAGTCCATCTCTCATGTAAAGCGTCGTAGTCATCCTCGGCACCACCTTCTGCCCTTCCTGCACCACCACCTT…
Cluster-38184.101957	1.5	1.4	1.6	0.1	0.07	0	103.37	95.11	132.09	7.99	4.06	0	4.60068	5.07316e-16	1.1537e-14	up	K00627 pyruvate dehydrogenase E2 component (dihydrolipoamide acetyltransferase) [EC:2.3.1.12] | (RefSeq) dihydrolipoyllysine-residue acetyltransferase component 2 of pyruvate dehydrogenase complex, mitochondrial-like isoform X1 (A)	cytochrome P450 704C1-like [Dendrobium catenatum]	RecName: Full=Cytochrome P450 704C1; EC=1.14.-.-; AltName: Full=Cytochrome P450 CYPD;	SubName: Full=Cytochrome P450 704C1 {ECO:0000313|EMBL:PKU73111.1};	Cytochrome P450 CYP4/CYP19/CYP26 subfamilies	GO:0016021,integral component of membrane; GO:0020037,heme binding; GO:0005506,iron ion binding; GO:0004497,monooxygenase activity; GO:0016705,oxidoreductase activity, acting on paired donors, with incorporation or reduction of molecular oxygen	Cytochrome P450	AAGAGATGGGGCTCTCTCTTGCTTTAATGTCTACATGCCTTCAACCAATAGTAGTACTTCTGCTGGTTTTGATTCCAATCAAAACCATGGATTTTGGTTAGGGAAGGAAAACAAGAGATACCATCCAAACGCTAGAACTATATTCTACCTGTTCCTACACTTAAGAAGATTGCATGATTACCTCACTGACATCTCTCGCAAACATAAAACCTTCAGAATATATGCTCCTTCTCGCAATCTAATCTGAACCACAGACCCAGCAATCGTGGAGCACATACTAAAGACCAACTTCAAAAATTACGGCAAGGGGCATTTCAATTATGAAAATTTGGAGGAATTATTTGGAGATGGAATATTCGGAGTAGATGGTGAAAAATGGCATCATCGTAGGAAATTGGC…
Cluster-38184.121414	19.29	18.77	15.6	0.37	0.65	1.46	142.94	135.07	134.29	3.13	3.92	11.54	4.27183	1.96344e-19	5.86149e-18	up	K20495 long-chain fatty acid omega-monooxygenase [EC:1.14.14.80] | (RefSeq) cytochrome P450 704B1 (A)	Cytochrome P450 704C1 [Dendrobium catenatum]	RecName: Full=Cytochrome P450 704C1; EC=1.14.-.-; AltName: Full=Cytochrome P450 CYPD;	SubName: Full=Cytochrome P450 704C1 {ECO:0000313|EMBL:PKU83145.1};	Cytochrome P450 CYP4/CYP19/CYP26 subfamilies	GO:0016021,integral component of membrane; GO:0020037,heme binding; GO:0005506,iron ion binding; GO:0004497,monooxygenase activity; GO:0016705,oxidoreductase activity, acting on paired donors, with incorporation or reduction of molecular oxygen	Cytochrome P450	TTGACAGAAGAATAACAATGGATGCAGCCTACAGCAGCCTACAACAGATTTGCAGATATATTATGCATCAAGGAATCTATACTTTAGGATATATAATAACATATTACATTCTTTAAGTATTTGCTTAGCAAGTATTTTCATAGGTCCAAGAAATGAGAAGTTGATGTATGCTTAAGTTTACATTAAGATCTCTTTTGAGTAGTGTAGCATTTATTTTAAAATATATAGAGATTACAAACGATAATGTTTATTGCAAGAGAAGAAATCTCCATCTGTAATATGTTACCAGCACTTTAAAGTTTGTAAGCTGCACTACCTGCATAAAACACGGAGACGAAGTTCTCCATCGATTTGGAGGGTTAGCATGGGCCTGTAATTAACAATTTGGTCTGCTGATAT…
Cluster-50626.0	0.73	1.12	1.68	0.18	0	0	26.13	39.41	71.56	7.39	0	0	4.18905	0.000391791	0.00171863	up	K20495 long-chain fatty acid omega-monooxygenase [EC:1.14.13.205] | (RefSeq) cytochrome P450 704B1 (A)	cytochrome P450 704C1-like isoform X1 [Dendrobium catenatum]	RecName: Full=Cytochrome P450 704C1; EC=1.14.-.-; AltName: Full=Cytochrome P450 CYPD;	SubName: Full=Cytochrome P450 704C1 {ECO:0000313|EMBL:PKU83737.1};	Cytochrome P450 CYP4/CYP19/CYP26 subfamilies	GO:0016021,integral component of membrane; GO:0020037,heme binding; GO:0005506,iron ion binding; GO:0004497,monooxygenase activity; GO:0016705,oxidoreductase activity, acting on paired donors, with incorporation or reduction of molecular oxygen	Cytochrome P450	TTTTTAAACAAATTATTTTTCAAACAACGGATTCACAATCAGCTTTACAAAAAGTTGCAGCTGTCCCAAACATCATATTTGAGCAGGAACGTCATTTGCTTGTTAAACATAGTGAATTTATTAACTTAAGCTTAAAGTTTTGATCCAAGTCATAACCACTTATAAAACTAGATATCATGGACTTGCCTGGGAATCGCATGTAAAAGAAGACCGTTTTCAATGTGAAGAGTTAACATGGTCTTGTACTTGACTAACCTTTTCTCATCACTTAGCTTAAACTTGAAGAAATACAGCAGGGTCGCCGCCAAGATTTTCATCTGCCTGTAAGCCATATCCTTACCCAGACAAATCCGAGGACCACCCTGGAAAGCAGTAAATTTGAACGGGCTCTCGTGAACA…
Cluster-38184.71024	4.86	6.94	8.01	0.99	0.23	0	128.63	179.82	252.32	30.54	5.22	0	3.86025	0.000141308	0.000683242	up	K00512 steroid 17alpha-monooxygenase / 17alpha-hydroxyprogesterone deacetylase [EC:1.14.14.19 1.14.14.32] | (RefSeq) cytochrome P450 76C2-like (A)	cytochrome P450 76C2-like [Dendrobium catenatum]	RecName: Full=Cytochrome P450 76M5 {ECO:0000305}; EC=1.14.13.192 {ECO:0000269|PubMed:22215681};	SubName: Full=Cytochrome P450 76C2 {ECO:0000313|EMBL:PKU70603.1};	Cytochrome P450 CYP2 subfamily	GO:0016021,integral component of membrane; GO:0016020,membrane; GO:0102597,3alpha-hydroxy-ent-sandaracopimardiene 9-beta-monooxygenase activity; GO:0020037,heme binding; GO:0005506,iron ion binding; GO:0004497,monooxygenase activity; GO:0016709,oxidoreductase activity, acting on paired donors, with incorporation or reduction of molecular oxygen, NAD(P)H as one donor, and incorporation of one atom…	Cytochrome P450	GTGTGTTCTCTATGTAAATTTCCCTATAATATTATAATATACTCAAATCTTTTTTATTTTTGTCATATCCCCTTATTGATTGTTCTTGTTCAGTCGTCCTATTAAACTAGGGGAGTGTACAGGTGGGAGAGAAAGGGAGAATGGCGTTTCCTCCAAACATCTCAGCTGACACAGGAATTGCCGCACCACTAACAATCTCCCTTACCGTCTTCCTCTTCTTTCTCATCATCTTAAAACGCAAACAAAAAAATGAAAAACAACTCCTTCCCCTCCCGCCAGGCCCGCACGGCCTGCCGATTCTTGGCAGCCTCCCCTTTCTCAACCCAAATTTGCACCACCACTTCGCCGGCCTTGCCCGATCCTATGGCCCAGTTCTCAGCCTCCGCCTCGGCTCCAAAC…
Cluster-38184.24598	4.01	3.72	2.14	0.35	0.16	0.25	29.96	27.01	18.56	3	1	2	3.52904	3.58077e-05	0.000193842	up	K20617 cytochrome P450 family 71 subfamily A | (RefSeq) cytochrome P450 71A9 (A)	Cytochrome P450 71A4 [Dendrobium catenatum]	RecName: Full=indole-2-monooxygenase; EC=1.14.13.137; AltName: Full=Cytochrome P450 71C4; AltName: Full=Protein benzoxazineless 2;	SubName: Full=Cytochrome P450 71A4 {ECO:0000313|EMBL:PKU64505.1};	Cytochrome P450 CYP2 subfamily	GO:0016021,integral component of membrane; GO:0020037,heme binding; GO:0036190,indole-2-monooxygenase activity; GO:0005506,iron ion binding	Cytochrome P450	CGCCGGAGGAGTTTCGGCCGGAACGGTTCATAAATGGTGAAGCAAAAGGCATAAATTTTAACATTCATGGTTTTCAATTATTGGCATTTGGTGCAGGAAGGAGATCTTGTCCTGGAATTCAATTCTCTGTCATTTTAATTGAACTTGTTATAGCTAACCTTATCTATGCCTTTGACTGGAAGCCAGCAAAGGGCCAAATAGAAGATATACATATGGGTGAAGTTTATGGACTTACTACTCGTAGAAAAGAGGCTCTTCTGCTCGTTGCAACAAAGGTAGATAAGTAGAGCAAAAAAAATGATAATTTATCTTTAGTATAATGGAAGATGAATTGATGTATTATTGTGTTGCAAGATAAACAAGTAATCAATATTTAGAGCTGCAGGCAAAAAATTTAGT…
Cluster-38184.235796	2.23	2.06	1.96	0.25	0.28	0	76	69	80.02	10	8	0.05	3.43657	5.6131e-06	3.49751e-05	up	K20666 gibberellin 13-oxidase [EC:1.14.-.-] | (RefSeq) cytochrome P450 714B3-like (A)	cytochrome P450 714B3-like [Phalaenopsis equestris]	RecName: Full=Cytochrome P450 714B3; EC=1.14.-.-;	SubName: Full=Cytochrome P450 714B3 {ECO:0000313|EMBL:PKA58572.1};	Cytochrome P450 CYP4/CYP19/CYP26 subfamilies	GO:0016021,integral component of membrane; GO:0020037,heme binding; GO:0005506,iron ion binding; GO:0004497,monooxygenase activity; GO:0016705,oxidoreductase activity, acting on paired donors, with incorporation or reduction of molecular oxygen	Cytochrome P450	TCTGTTTAAAAATTTCCCCTATGTGAAAGTATGCATTGATAATTAAGGCACACATATAGACCCAATCAATTAGGTTGACTAAACCTTCTTCACAATCAGATCAACGCCATGCTCTGGCTCTACAATTAATCTCAATGTCGGCGAATGCTTATAGTTGGGCGACGAAGTGAAGCTAAATTTCTGAAGGATGAGAGCGAGTGCAATCTTAAGTTGTGCCATGGCGAAGTTTTGCCCCAGGCATGTTCGAGGCCCCGCGCCGAAGGGCAGATACATCTGGGGCAGTCTGCACGCGCCCATGACGCCGTGCTCGAATCTCTTGGGATTGAATTCATAGGCGTCTGCTCCCCATATGTGAAGGTCTTGGTGCATTGTGGGAAGTGGAATAAAAATATTTATGCC…
Cluster-38184.50550	0.62	2.64	1.74	0.21	0.14	0.13	12.89	54.05	43.31	5.18	2.42	2.86	3.30227	8.19507e-05	0.000415125	up	K15639 PHYB activation tagged suppressor 1 [EC:1.14.-.-] | (RefSeq) cytochrome P450 734A6 (A)	cytochrome P450 734A6 [Dendrobium catenatum]	RecName: Full=Cytochrome P450 734A6; EC=1.14.-.-;	SubName: Full=Cytochrome P450 734A6 {ECO:0000313|EMBL:PKU72976.1};	Cytochrome P450 CYP4/CYP19/CYP26 subfamilies	GO:0016021,integral component of membrane; GO:0020037,heme binding; GO:0005506,iron ion binding; GO:0004497,monooxygenase activity; GO:0016705,oxidoreductase activity, acting on paired donors, with incorporation or reduction of molecular oxygen; GO:0010268,brassinosteroid homeostasis; GO:0016131,brassinosteroid metabolic process; GO:0040008,regulation of growth	Cytochrome P450	AGCGGCGTCCGGCTGCCGGGAAACCCGGCTACGGTGGCGGTGATCTCAGTGAGGGACATAGTGGAGGAGTGCAAGACATTCTTCTTCGCGGGTAAGCAGACCACAACCAATCTGCTGACGTGGACGACGGTGCTGCTCGGCATGCATCCGGAATGGCAGGAGCGCGCCCGCCAAGAGGTCCTCCAGGTGTGCGGTTCACGTGACATCCCCTCCCGAGAGCAGCTCTCCAAACTCAAAACGGTATCTCTGAATTTAATATATATATATATAACATTTACAGATCAAATAAATATTGAGGTTCGTATTATTGCGTTAATATGATCCAACTGCAGCTTGGTATGATATTGAACGAGACTATGAGGCTATATCCACCTGCAGTGGCAACAATTCGTCGAGCAA…
Cluster-50626.2	1.88	1.34	1.41	0.16	0	0.45	52.09	36.27	46.44	5.17	0	13.24	2.7986	0.00139825	0.00539143	up	K20495 long-chain fatty acid omega-monooxygenase [EC:1.14.14.80] | (RefSeq) cytochrome P450 704B1 (A)	cytochrome P450 704C1-like isoform X3 [Dendrobium catenatum]	RecName: Full=Cytochrome P450 704C1; EC=1.14.-.-; AltName: Full=Cytochrome P450 CYPD;	SubName: Full=Cytochrome P450 704C1 {ECO:0000313|EMBL:PKU83737.1};	Cytochrome P450 CYP4/CYP19/CYP26 subfamilies	GO:0016021,integral component of membrane; GO:0020037,heme binding; GO:0005506,iron ion binding; GO:0004497,monooxygenase activity; GO:0016705,oxidoreductase activity, acting on paired donors, with incorporation or reduction of molecular oxygen	Cytochrome P450	TTTTTAAACAAATTATTTTTCAAACAACGGATTCACAATCAGCTTTACAAAAAGTTGCAGCTGTCCCAAACATCATATTTGAGCAGGAACGTCATTTGCTTGTTAAACATAGTGAATTTATTAACTTAAGCTTAAAGTTTTGATCCAAGTCATAACCACTTATAAAACTAGATATCATGGACTTGCCTGGGAATCGCATGTAAAAGAAGACCGTTTTCAATGTGAAGAGTTAACATGGTCTTGTACTTGACTAACCTTTTCTCATCACTTAGCTTAAACTTGAAGAAATACAGCAGGGTCGCCGCCAAGATTTTCATCTGCCTGTAAGCCATATCCTTACCCAGACAAATCCGAGGACCACCCTGGAAAGCAGTAAATTTGAACGGGCTCTCGTGAACA…
Cluster-38184.90980	14.84	12.81	17.5	2.1	2.41	2.1	583.63	494.56	822.16	96.71	80.43	88.05	2.64339	4.08397e-44	3.88941e-42	up	K07418 cytochrome P450 family 2 subfamily J [EC:1.14.14.1] | (RefSeq) premnaspirodiene oxygenase-like (A)	premnaspirodiene oxygenase-like [Dendrobium catenatum]	RecName: Full=Premnaspirodiene oxygenase; Short=HPO; EC=1.14.13.121; AltName: Full=Cytochrome P450 71D55;	SubName: Full=Premnaspirodiene oxygenase {ECO:0000313|EMBL:PKU79000.1};	Cytochrome P450 CYP2 subfamily	GO:0016021,integral component of membrane; GO:0020037,heme binding; GO:0005506,iron ion binding; GO:0004497,monooxygenase activity; GO:0016705,oxidoreductase activity, acting on paired donors, with incorporation or reduction of molecular oxygen	Cytochrome P450	AAGTTCTCTCCACCCTTCTTCCTCCTATCCTCTCCACTCTCCTCCTAGTTCTTCTCATAAAAAAGCTTACCCATCAAAAACCCTTCAATAATAATAAGTTCCCTCCAGGCCCACCGAGGCTCCCCATCATCGGAAACTTGCACCAACTAATAGGTGAGCATCCACATCGCCGGCTTCAAAACCTTGCAAATACCTACGGCCCTCTCCTCCACCTCAAACTCGGTGAGATCAATCTTATAGTCATCACGTCCAGTGAATTCGTTCGTGATGTTTTTAAAACCCATGACCTCAAATTCGCTTCTAGGCCCAAGTTATTGGCAGGCAAGATCATCCTCTACGATGCCGACTTTGGCCTTGCACCTTATGGCAAAACATGGTCACAACTACGTAAAGTCTGCA…
Cluster-38184.95877	1.52	1.84	1.02	0.21	0.15	0.46	37	44	29.63	6.05	3	12	2.26969	0.000191675	0.000901768	up	--	Cytochrome P450 704C1 [Dendrobium catenatum]	RecName: Full=Cytochrome P450 704C1; EC=1.14.-.-; AltName: Full=Cytochrome P450 CYPD;	SubName: Full=Cytochrome P450 704C1 {ECO:0000313|EMBL:PKU83145.1};	Cytochrome P450 CYP4/CYP19/CYP26 subfamilies	GO:0016021,integral component of membrane; GO:0020037,heme binding; GO:0005506,iron ion binding; GO:0004497,monooxygenase activity; GO:0016705,oxidoreductase activity, acting on paired donors, with incorporation or reduction of molecular oxygen	--	CAAATTTGAAGTAGTACAGAAGAATAGCAGTAAAAATCTTCATCTGTTTATAAGCAAAATCCTTTCCCAAACAGATACGAGGTCCAGCCTAGCAAGGAAAAAATAATTATAACTAAAGGAATATTTCATGAATATTGTTTCAATTCTTGTATACATATACTATTCTTTTTATTTGGAAATAATCCAACCGTGATAACTATTTAAAATTTTGAAACTTGCAGTAAAAACTTATCCGATCTTAATCAAGTTTCTATATCCTAAGACTTTCTTAGTACTATATATATATATCGTGAGCTGGATCAATCCTATTTTGGTACATTTCAATTCAAGTTCAATCCAAGCCAAAATTAGCTTGTTAGTTGGCTTATTAACTTAGATTTAGCTCAATCCAAGTCTAAA…
Cluster-38184.231101	2.83	1.41	1.37	0.14	0.34	0.63	49.86	24.25	28.59	2.8	5	11.75	2.19603	0.00240261	0.0087252	up	K07408 cytochrome P450 family 1 subfamily A polypeptide 1 [EC:1.14.14.1] | (RefSeq) cytochrome P450 81E8-like (A)	cytochrome P450 81E8-like [Dendrobium catenatum]	RecName: Full=Cytochrome P450 81E8 {ECO:0000303|PubMed:14617078}; EC=1.14.13.- {ECO:0000305};	SubName: Full=Isoflavone 2'-hydroxylase {ECO:0000313|EMBL:PKU65918.1};	Cytochrome P450 CYP2 subfamily	GO:0016021,integral component of membrane; GO:0020037,heme binding; GO:0005506,iron ion binding; GO:0004497,monooxygenase activity; GO:0016705,oxidoreductase activity, acting on paired donors, with incorporation or reduction of molecular oxygen	Cytochrome P450	GTAACAAGAGATTTGATGAAACGATCATCGTACTGTTCGGGATGGGTTCGTTGGAGCGATAAGAGGGCATCTATCATTGTTTTATGGTTCTTACGGTCTTCCTTTGCTAACTCCCCTGCTTCTACTTCTTCCAACTCTATCTTCCTCCTATGCTCATCTACAAGAGCCTGCATAAATTTGTCCCTGTAACCGTGAATCCGAGCAAGCCTGCTCTGCACTCTTCGCCGGGCAAACCACCCGAGCACTGAAGGAAGGAAGTCTCCAACGTTGGAAACGCCGGCAATGGTGAAACCCTCTGTCACCATCTTTCTAAACCGCCGCGTCTCGCCGTCATCGGACTCTTCGCTGTAGTATGGCTTTCCGACCATCATCTTCATCATCACGTTCATGGCAAGATCG…
Cluster-38184.91058	35.37	34.39	35.76	9.92	8.84	7.83	1193.37	1138.44	1439.84	391.29	252.57	281.95	1.84909	2.00519e-62	3.20855e-60	up	K07418 cytochrome P450 family 2 subfamily J [EC:1.14.14.1] | (RefSeq) premnaspirodiene oxygenase-like (A)	premnaspirodiene oxygenase-like [Dendrobium catenatum]	RecName: Full=Germacrene A oxidase; Short=LsGAO; AltName: Full=Germacrene A alcohol dehydrogenase; EC=1.1.1.314 {ECO:0000269|PubMed:20351109}; AltName: Full=Germacrene A hydroxylase; EC=1.14.13.123 {ECO:0000269|PubMed:20351109};	SubName: Full=Premnaspirodiene oxygenase {ECO:0000313|EMBL:PKU79001.1};	Cytochrome P450 CYP2 subfamily	GO:0005789,endoplasmic reticulum membrane; GO:0016021,integral component of membrane; GO:0102260,germacrene A alcohol dehydrogenase activity; GO:0020037,heme binding; GO:0005506,iron ion binding; GO:0004497,monooxygenase activity; GO:0016705,oxidoreductase activity, acting on paired donors, with incorporation or reduction of molecular oxygen	Cytochrome P450	AAGTTCTCTCCACCCTTCTTCCTCCTATCCTCTCCACTCTCCTCCTAGTTCTTCTCATAAAAAAGCTTACCCATCAAAAACCCTTCAATAATAATAAGTTCCCTCCAGGCCCACCGAGGCTCCCCATCATCGGAAACTTGCACCAACTAATAGGTGAGCATCCACATCGCCGGCTTCAAAACCTTGCAAATACCTACGGCCCTCTCCTCCACCTCAAACTCGGTGAGATCAATCTTATAGTCATCACGTCCAGTGAATTCGTTCGTGATGTTTTTAAAACCCATGACCTCAAATTCGCTTCTAGGCCCAAGTTATTGGCAGGCAAGATCATCCTCTACGATGCCGACTTTGGCCTTGCACCTTATGGCAAAACATGGTCACAACTACGTAAAGTCTGCA…
Cluster-38184.37198	1.71	1.73	0.8	0.38	0.35	0.39	57.95	57.4	32.36	15	10	14	1.77308	0.000302367	0.00136252	up	K12639 cytochrome P450 family 724 subfamily B polypeptide 1 [EC:1.14.13.-] | (RefSeq) cytochrome P450 724B1 isoform X1 (A)	cytochrome P450 724B1 isoform X1 [Dendrobium catenatum]	RecName: Full=Cytochrome P450 724B1; EC=1.14.-.-; AltName: Full=Dwarf protein 11; AltName: Full=OsDWARF11;	SubName: Full=Cytochrome P450 724B1 {ECO:0000313|EMBL:PKU65125.1};	Cytochrome P450 CYP4/CYP19/CYP26 subfamilies	GO:0005623,cell; GO:0016021,integral component of membrane; GO:0008199,ferric iron binding; GO:0020037,heme binding; GO:0004497,monooxygenase activity; GO:0016705,oxidoreductase activity, acting on paired donors, with incorporation or reduction of molecular oxygen; GO:0016132,brassinosteroid biosynthetic process; GO:0010268,brassinosteroid homeostasis; GO:0006879,cellular iron ion homeostasis; GO…	Cytochrome P450	TAAATATGCATCACCTCTTCCTGCATTAATCTACCAAAAGGCTGCTTTCCTTTTACTCATGGTACCAATAAATTGAGGCAGACTCCCTCTTCTCTGAAACAAGGAGCAGCTCGTAATGATGTTTAAAGAACTTCTTTCTCTTCTGTGTTTGGGATTCACAGGCCTTGCCCTGTGTTTGTTTCTGAATCATTTTCTTCCTTTACTAATGAATCTTGGGGTTCTTCCAAGAGGGAATTTTGGCTGGCCTTTGGTTGGTGAAACTTTGAGGTTTCTCTCCCCACACGCTTCAAAAACTCTTGGTGACTTCTTGGAAGATCATATTTCAAGGTATGGAAAAGTATTCAAATCACATCTTTTCTGCAGTCCAACCATTGTGTCATGTGACCTGGAGCTGAACCA…
Cluster-38184.65696	22.97	24.33	18	7.17	6.18	6.05	171.3	176.2	155.93	60.94	37.44	48.07	1.6265	1.41581e-11	1.98451e-10	up	K20617 cytochrome P450 family 71 subfamily A | (RefSeq) cytochrome P450 71A9 (A)	Cytochrome P450 71A4 [Dendrobium catenatum]	RecName: Full=indole-2-monooxygenase; EC=1.14.13.137; AltName: Full=Cytochrome P450 71C4; AltName: Full=Protein benzoxazineless 2;	SubName: Full=Cytochrome P450 71A4 {ECO:0000313|EMBL:PKU64505.1};	Cytochrome P450 CYP2 subfamily	GO:0016021,integral component of membrane; GO:0020037,heme binding; GO:0036190,indole-2-monooxygenase activity; GO:0005506,iron ion binding	Cytochrome P450	CGCCGGAGGAGTTTCGGCCGGAACGGTTCATAAATGGTGAAGCAAAAGGCATAAATTTTAACATTCATGGTTTTCAATTATTGGCATTTGGTGCAGGAAGGAGATCTTGTCCTGGAATTCAGTTCTCAATCACTTTAATTGAGCTTGTTATAGCTAACCTTATCTATGCCTTTGACTGGAAGCCAGCAAAGGGCCAAATAGAAGATATAGATATGGGTGAAGTTTATGGACTTACTACTCGTAGAAAAGAGGCTCTTCTGCTCGTTGCAACAAAGGTAGATAAGTAGAGCAAAAAAATGATAATTTATCTTTAGTATAATGGAAGATGAATTGATGTATTATTGTGTTGCAAGATAAACAAGTAATCAATATTTAGAGCTGCAGGCAAAAAATTTAGTC…
Cluster-38184.88327	16.65	19.11	14.77	4.56	4.39	6.03	333.77	375.19	351.62	106.42	73.82	129.08	1.61773	6.71948e-17	1.64472e-15	up	K00512 steroid 17alpha-monooxygenase / 17alpha-hydroxyprogesterone deacetylase [EC:1.14.14.19 1.14.14.32] | (RefSeq) cytochrome P450 76C2-like (A)	cytochrome P450 76C2-like [Dendrobium catenatum]	RecName: Full=Cytochrome P450 76M5 {ECO:0000305}; EC=1.14.13.192 {ECO:0000269|PubMed:22215681};	SubName: Full=Cytochrome P450 76C2 {ECO:0000313|EMBL:PKU70603.1};	Cytochrome P450 CYP2 subfamily	GO:0016021,integral component of membrane; GO:0016020,membrane; GO:0102597,3alpha-hydroxy-ent-sandaracopimardiene 9-beta-monooxygenase activity; GO:0020037,heme binding; GO:0005506,iron ion binding; GO:0004497,monooxygenase activity; GO:0016709,oxidoreductase activity, acting on paired donors, with incorporation or reduction of molecular oxygen, NAD(P)H as one donor, and incorporation of one atom…	Cytochrome P450	GTGTGTTCTCTATGTAAATTTCCCTATAATATTATAATATACTCAAATCTTTTTTATTTTTGTCATATCCCCTTATTGATTGTTCTTGTTCAGTCGTCCTATTAAACTAGGGGAGTGTACAGGTGGGAGAGAAAGGGAGAATGGCGTTTCCTCCAAACATCTCAGCTGACACAGGAATTGCCGCACCACTAACAATCTCCCTTACCGTCTTCCTCTTCTTTCTCATCATCTTAAAACGCAAACAAAAAAATGAAAAACAACTCCTTCCCCTCCCGCCAGGCCCGCACGGCCTGCCGATTCTTGGCAGCCTCCCCTTTCTCAACCCAAATTTGCACCACCACTTCGCCGGCCTTGCCCGATCCTATGGCCCAGTTCTCAGCCTCCGCCTCGGCTCCAAAC…
Cluster-38184.66512	6.63	3.28	1.82	1.03	0.97	1.66	156.64	75.87	51.23	28.25	19.4	42	1.55372	0.00624317	0.0201256	up	K00512 steroid 17alpha-monooxygenase / 17alpha-hydroxyprogesterone deacetylase [EC:1.14.14.19 1.14.14.32] | (RefSeq) premnaspirodiene oxygenase-like (A)	premnaspirodiene oxygenase-like [Dendrobium catenatum]	RecName: Full=Premnaspirodiene oxygenase; Short=HPO; EC=1.14.13.121; AltName: Full=Cytochrome P450 71D55;	SubName: Full=Premnaspirodiene oxygenase {ECO:0000313|EMBL:PKU60886.1};	Cytochrome P450 CYP2 subfamily	GO:0016021,integral component of membrane; GO:0020037,heme binding; GO:0005506,iron ion binding; GO:0004497,monooxygenase activity; GO:0016705,oxidoreductase activity, acting on paired donors, with incorporation or reduction of molecular oxygen	Cytochrome P450	TACAATTGAACTAGCCTTTCGTCTTCCTCTTTCTCTGATATCGATCGCCTGTAAAAAAAGTTTAAAAAAATTGCAATTTTAGCTGTGTATGTAAAACTCCTATAAATCCACAACAAAATCCTGAATTGGTCAAAATCAATGGATCAAATACTCCTAATCCTCTTCTTTTCTCTGCTACTCATCGTCGTCACCCTAATTCTGATCACCAAATCCATGAAGTCCAGCTCCAACTCACCATCAACTCACATCTTCCCAGCTCCTCTGCCGCCGAGCCCCCGACAGCTACCCATCATCGGCCACCTCCATCATCTACTCTCCGGCGACCCCATCCCCCACATTTCTCTCCGAAACCTCTCCTCCCTTCACGGCCCCATCATTCTCCTCCGCCTCGGCCAACTA…
Cluster-38184.239514	3.27	3.25	2.1	1.16	0.63	1.03	118	114.99	90.21	49	19.24	39.8	1.45661	3.96406e-05	0.00021284	up	K15639 PHYB activation tagged suppressor 1 [EC:1.14.-.-] | (RefSeq) cytochrome P450 734A6-like (A)	cytochrome P450 734A6-like [Phalaenopsis equestris]	RecName: Full=Cytochrome P450 734A6; EC=1.14.-.-;	SubName: Full=Uncharacterized protein {ECO:0000313|EnsemblPlants:GSMUA_Achr10P28450_001};	Cytochrome P450 CYP4/CYP19/CYP26 subfamilies	GO:0016021,integral component of membrane; GO:0020037,heme binding; GO:0005506,iron ion binding; GO:0004497,monooxygenase activity; GO:0016705,oxidoreductase activity, acting on paired donors, with incorporation or reduction of molecular oxygen; GO:0010268,brassinosteroid homeostasis; GO:0016131,brassinosteroid metabolic process; GO:0040008,regulation of growth	Cytochrome P450	TGTCGGACCGCTGCCGACGGCTGGGACGATCTCGGTGCGAGACATCGTGGAGGAGTGCAAGACATTCTTCTTCGCAGGGAAGCAGACAACTTCGAACCTGCTGACATGGACAACTGTACTCCTCGCCATGCACCCGGAGTGGCAGGAACGCGCCCGCCTTGAGGTCCTTCAGATGTGCGGCTCACATGATCTCCCCACTCGTGACCAGCTCGCCAGACTCAAAACGCTGGGAATGATTCTAAATGAGACTATGAGGCTATATCCACCGGCGGTGGCCACAATCCGGCGGGCGAAGGCCGACGTCGAGCTCGGTGGGTACAAAATCCCACAGGGGACTGAACTTCTTATACCAATCATGGCGGTTCACCATGATGCAGGGCTGTGGGGTTCGGATGCGAC…
Cluster-38184.167452	0.66	0.46	0.51	0.17	0.18	0.22	50.14	34.16	46.59	15.36	11.57	17.8	1.36504	0.000559822	0.00237345	up	K15747 beta-ring hydroxylase [EC:1.14.-.-] | (RefSeq) protein LUTEIN DEFICIENT 5, chloroplastic (A)	cytochrome P450 97B2, chloroplastic isoform X5 [Dendrobium catenatum]	RecName: Full=Cytochrome P450 97B3, chloroplastic; EC=1.14.-.-; Flags: Precursor;	SubName: Full=Cytochrome P450 97B2, chloroplastic {ECO:0000313|EMBL:PKU76811.1};	Cytochrome P450 CYP4/CYP19/CYP26 subfamilies	GO:0009507,chloroplast; GO:0009941,chloroplast envelope; GO:0031969,chloroplast membrane; GO:0009570,chloroplast stroma; GO:0020037,heme binding; GO:0005506,iron ion binding; GO:0004497,monooxygenase activity; GO:0016705,oxidoreductase activity, acting on paired donors, with incorporation or reduction of molecular oxygen; GO:0016117,carotenoid biosynthetic process	Cytochrome P450	AAAAAATGAAAATACCCGTCCTACTATATAGACCTACATCTAGAGCCTAAGTGGCTCGACTCTATCTAACCCGTTCAAGGTGCAAACACTCTGTGTTAGACGATGACTCATAGGTATATTATAAGATAGGATAAGTTAGGATATTGAAACAAGATAGAAAGTTAACCGTTTTCTTGAACCTACATTGAGACAATTTCAAATGCATATTTACTTACTGCACATGATAAAAGTAATATGTTATGATTTACACACAATAATCATCATGCATATTGTTTAGTAGTTTTTAAATTACTATCATTTAGCAATATTGTTAGCCACATAGTTGGTTAATTCATCCTTTAGTGGATAACCATTTTCAGGAAAAGCCCCTTTAGCCTAAATAGATAAAAGGAGAGAGTT…
Cluster-38184.95734	8.28	7.61	5.76	1.25	4.52	2.06	105.96	95.15	86.89	18.45	48.05	28.09	1.35642	0.00984448	0.0297395	up	K17854 cytochrome P450 family 2 subfamily K | (RefSeq) cytochrome P450 71A1-like (A)	Cytochrome P450 71A4 [Dendrobium catenatum]	RecName: Full=Cytochrome P450 71A1; EC=1.14.-.-; AltName: Full=ARP-2; AltName: Full=CYPLXXIA1;	SubName: Full=Cytochrome P450 71A4 {ECO:0000313|EMBL:PKU64505.1};	Cytochrome P450 CYP2 subfamily	GO:0005789,endoplasmic reticulum membrane; GO:0016021,integral component of membrane; GO:0031090,organelle membrane; GO:0020037,heme binding; GO:0005506,iron ion binding; GO:0004497,monooxygenase activity; GO:0016705,oxidoreductase activity, acting on paired donors, with incorporation or reduction of molecular oxygen; GO:0009835,fruit ripening	Cytochrome P450	ATCAAGTAATTATTCATATATTATATTTATTAAAAATATTATGGAATATTTACTCATCCTCATCAAATTGAGATAAGAACATCCAAACCCAATCTTTATATTCTTACGTGTTACATTATTCATGCCATGTATAGGATATGTTTGGTGCTGGAACAGACTCGACCTCCATATCCATGGACTGGATAATGGCCGAGCTCATTCGCCACCCAGCCGCCATGAAAAAGCTCAAGGAAGAAATAATCAAAGTAGCAGGCCCCAACAAAACAATCATCAAAGAAGAACAATTGGCAGATATGAGCTATCTCAAAGCAATAGTAAAAGAGGCCCTCAGGCTTCATTCTCCAGGTCCTATAATAGTACCTCGCCAACTTACAGAAGACACAATCATCAAAGGCTACA…
Cluster-38184.227321	14.46	16.38	16.85	2.98	6.09	8.68	26.89	28.51	33.26	5.78	8	17	1.33642	0.016764	0.0467599	up	K11868 indoleacetaldoxime dehydratase [EC:4.99.1.6] | (RefSeq) indoleacetaldoxime dehydratase-like (A)	Cytochrome P450 71A4 [Dendrobium catenatum]	RecName: Full=Cytochrome P450 71A6; EC=1.14.-.-; Flags: Fragment;	SubName: Full=Cytochrome P450 71A4 {ECO:0000313|EMBL:PKU64505.1};	Cytochrome P450 CYP2 subfamily	GO:0016021,integral component of membrane; GO:0020037,heme binding; GO:0005506,iron ion binding; GO:0004497,monooxygenase activity; GO:0016705,oxidoreductase activity, acting on paired donors, with incorporation or reduction of molecular oxygen	Cytochrome P450	ATACACCCCCTCCCACCCTCTCCCCCTAAGCTCCCCATCATCGGCAACCTCCATCAACTTGGCTCTCTACCACATCGCTCCCTCCACCACCTCTCAAACCGTCATGGCTCCCTAATGCTCCTCCACTTTGGCCACTTCCCAGTCCTCGTCGCCTCCTCCCCTTCTATCGTCCGTGAAATCACTCAAATCCAAGATCATCTCTTTGCCAACCGCCCTTCTCTTAAGGCCTCCTCCGTACTTTTCTACCATGGTCGTGACATTGCCTTCGCCCCCTATGGTGAATATTGGAGGGAGGCGAAAAAAGTGGCAATTCTTCACCTTCTTAGCAATAA
Cluster-38184.239511	1.5	2.5	2	0.84	0.61	0.91	36.24	59.01	57.46	23.62	12.32	23.34	1.20641	0.00214811	0.00789649	up	K15639 PHYB activation tagged suppressor 1 [EC:1.14.-.-] | (RefSeq) cytochrome P450 734A6-like (A)	cytochrome P450 734A6-like [Phalaenopsis equestris]	RecName: Full=Cytochrome P450 734A6; EC=1.14.-.-;	SubName: Full=Cytochrome P450 734A6 {ECO:0000313|EMBL:OAY77576.1};	Cytochrome P450 CYP4/CYP19/CYP26 subfamilies	GO:0016021,integral component of membrane; GO:0020037,heme binding; GO:0005506,iron ion binding; GO:0004497,monooxygenase activity; GO:0016705,oxidoreductase activity, acting on paired donors, with incorporation or reduction of molecular oxygen; GO:0010268,brassinosteroid homeostasis; GO:0016131,brassinosteroid metabolic process; GO:0040008,regulation of growth	Cytochrome P450	AAGCTGCTCATATTGCAGCAATAAAAGGGGGAGAAGCCAAAAGGTTGAAGAGTTGGGTGTTATGCTACTATTGGCAGCTTTAGTGGTAGCAATAGCAGCAAGAGTGATTGGAGAAGCAAATAAAAGAAGAGGATAGTGGAGAAGAAAAAGACAGGAGAAAGGATGAGGGAGGAGATGTGGGGATGGCTATTGAGTTGGGTGCTGTCTCTGGCGGCTGCAGTGCTGTGTATGGCGGCGGCATTTAAGTTGGTAGACATCTTATGGTGGAAGCCAAAGAGGATCGAAGAGCACTTCGCAAAGCAGGGCATAAAAGGTCCTCCCTACCGCTTCTTTATCGGCAACCTTAGGGAGATGGTGAGCTTGATGCTTGACGCATCGTCGAAGCCAATGACGCCCAAG…
Cluster-38184.81808	0.85	0.8	0.91	0.31	0.43	0.28	28	26	36	12	12	10	1.2053	0.00782903	0.0244858	up	K20771 carlactone C-19 oxidase [EC:1.14.-.-] | (RefSeq) cytochrome P450 711A1-like (A)	Cytochrome P450 711A1 [Dendrobium catenatum]	RecName: Full=Cytochrome P450 711A1; EC=1.14.-.-; AltName: Full=Protein MORE AXILLARY BRANCHES 1;	SubName: Full=Cytochrome P450 711A1 {ECO:0000313|EMBL:PKU80848.1};	Cytochrome P450 CYP3/CYP5/CYP6/CYP9 subfamilies	GO:0016021,integral component of membrane; GO:0020037,heme binding; GO:0005506,iron ion binding; GO:0004497,monooxygenase activity; GO:0016705,oxidoreductase activity, acting on paired donors, with incorporation or reduction of molecular oxygen; GO:0009926,auxin polar transport; GO:0016117,carotenoid biosynthetic process; GO:0009963,positive regulation of flavonoid biosynthetic process; GO:000993…	Cytochrome P450	CATACAAAAGGATCACACTGCAAGAAATGTTCCTGAAGGAACAAGATTACTAATAAAAATTCTGTATAACACTGATGTTAATTAGAGCTTCTCTTAATAGCTCTTATCTTAACCCCACGCTTGAATCCCAGTACTAAACCATACTCAAGCTCAAGAGGAGATTCCATCTTTGCAGAATGCCTGAACACGTAATTCTGGTATAGGCAAATGAGAGCAAGCTTGATCTCTTGCAGTGCAAACTTCTGGCCAATGCAAGCTCGTGGACCGATCCCAAATGGTATGTTGGCATATGAATTCCTTCTCTTCTCTTCATCACAGTTTGGTTCAAATCTCTCTGGTCTGAATACCTCGGGATCTGGGAATTGTTTGGGGTCCTTAGCCAAAGCCCCCAGTGCAAGC…
Cluster-38184.65694	51.22	48.11	56.96	23.07	20.08	19.13	918.84	844.53	1211.01	480.72	301.7	366.26	1.19339	6.10727e-22	2.18251e-20	up	K17854 cytochrome P450 family 2 subfamily K | (RefSeq) cytochrome P450 71A1-like (A)	Cytochrome P450 71A4 [Dendrobium catenatum]	RecName: Full=Cytochrome P450 71A8; EC=1.14.-.-;	SubName: Full=Cytochrome P450 71A4 {ECO:0000313|EMBL:PKU64505.1};	Cytochrome P450 CYP2 subfamily	GO:0016021,integral component of membrane; GO:0020037,heme binding; GO:0005506,iron ion binding; GO:0004497,monooxygenase activity; GO:0016705,oxidoreductase activity, acting on paired donors, with incorporation or reduction of molecular oxygen	Cytochrome P450	CGAGGAGTAAGTGGTGGGGGGATAGGATAAGGAGGCTTATAGAAGAGAGCTCAAGGCTTTCAGGAGAATTCTATGTTGGTGATTTTCTACCATGGTTGGGGAAGATAATTGGTTTATTGAATGGGTTTGAGTGGAGGGTGAGAAAGTCATTTGAGATGTCGGATAAGCTCCTTGAAGAAATAGTGAAGGAGCGTAGGAGTGAGATAGAGAAGAGGATGGAGGAAGAAAGAGGAGTTGGACGGGATAATAATATTTCTTATGATGAGTGCTTTTTAGATGCTTTGTTGGCTCTTGAGGAGTTAAATTATAAGGGTGTTGTTTTCGATGATGAGAGTATAAAGGCCATAGTTAAGGATATGTTTGGTGCTGGAACAGACTCGACCTCCATATCCATGGACT…
Cluster-38184.173884	4	4.3	4.53	2.2	1.73	1.69	203.59	214.83	276.04	131.08	74.79	92.08	1.04886	1.63181e-08	1.50721e-07	up	K09590 brassinosteroid-6-oxidase 1 [EC:1.14.-.-] | (RefSeq) cytochrome P450 85A1-like (A)	cytochrome P450 85A1-like [Dendrobium catenatum]	RecName: Full=Cytochrome P450 85A1; EC=1.14.-.-; AltName: Full=C6-oxidase; AltName: Full=Dwarf protein;	SubName: Full=Cytochrome P450 85A1 {ECO:0000313|EMBL:PKU81109.1};	Cytochrome P450 CYP4/CYP19/CYP26 subfamilies	GO:0016021,integral component of membrane; GO:0020037,heme binding; GO:0005506,iron ion binding; GO:0004497,monooxygenase activity; GO:0016705,oxidoreductase activity, acting on paired donors, with incorporation or reduction of molecular oxygen; GO:0016132,brassinosteroid biosynthetic process; GO:0010268,brassinosteroid homeostasis; GO:0007275,multicellular organism development; GO:0016125,sterol…	Cytochrome P450	ATATATATATATATATATATATACTGAACTACTGAACTAGTAACTCTCAACACGAATGCGTAATCCATCGGGTGCTTCAACTCTGGGGAATTTATGTATTGTTGCTACTCCAACTTCCTCCCATCTGCATCATTATATTGCATATATGTGATTAGAGATAGGGTTGAACAATAGCAAATGTTCCAATAATGCTTGTTCCTTATTAAGTAAAGGCATTACATCAGGTAATCTATATATATATATATATATTCACCTGTTATGCAACTATGACCTGCCCTCTATTAACAGATAAAATTTTGAGTACAGTTAATACCTGTATCTAGTGACAAAATAGTGCAGAAATGTAGCAATCTCAACTGTGCCCAACTCCTTCCCAGGGCACAACCTACTGCCTCCACC…
Cluster-38184.145387	2.64	1.74	1.36	0.84	0.69	1.01	78.18	50.42	47.85	28.83	17.21	31.86	1.03082	0.0110022	0.0326985	up	K20617 cytochrome P450 family 71 subfamily A | (RefSeq) cytochrome P450 71A1-like (A)	cytochrome P450 71A1-like [Dendrobium catenatum]	RecName: Full=Cytochrome P450 71A1; EC=1.14.-.-; AltName: Full=ARP-2; AltName: Full=CYPLXXIA1;	SubName: Full=Cytochrome P450 71A1 {ECO:0000313|EMBL:PKU73910.1};	Cytochrome P450 CYP2 subfamily	GO:0005789,endoplasmic reticulum membrane; GO:0016021,integral component of membrane; GO:0031090,organelle membrane; GO:0020037,heme binding; GO:0005506,iron ion binding; GO:0004497,monooxygenase activity; GO:0016705,oxidoreductase activity, acting on paired donors, with incorporation or reduction of molecular oxygen; GO:0009835,fruit ripening	Cytochrome P450	AAACGGGCTTATAAATTAAGATGAATACAACTCTGGTTCTAGTTGTTTTCTTCTTGGTTCCCTTGTTCATCTTGCTCACAGAGAAAAGGAGGAGGAGGAACATCTCAAACAAGATACCTCTCCTACCTACACTTCCAGGGCTTCCCTTGATAGGTAATGTCCATGAACTTGGCTCGCTGCCACAAAGCTCACTCAGGGAGCTGTCGAAGAAGCATGGATCCCTCATGCTTCTACATCTAGGTTCCATTCCAACATTGGTAGTCTCTTCACCCAAGCTTGCTCAAGAGTTTATGAGAACTCATGACATCGTATTCGCAAGTCGACCCTCTTCTAAGGTATCAAAGCTTTTATCCTACAACAACATTGACATAGCCTTCTCACCCTATGGCGATTGTTGGA…
