# Supplementary material for: Integration of the metabolome and transcriptome reveals indigo biosynthesis in Phaius flavus flowers under freezing treatment
Source: PeerJ. 2022 Mar 14;10:e13106. doi: 10.7717/peerj.13106 (PMC8929171; doi:10.7717/peerj.13106)
Supplement: Supplemental Information 5 [file peerj-10-13106-s005.xlsx]

## Sheet: Sheet1
Sample Name	Peak area
	indican	isatin	indigo	indirubin	indican content ug/mL	AVG	SD	P-Value	indigo content ug/mL	AVG	SD	P-Value	indiubin content ug/mL	AVG	SD	P-Value
P.flavus CK1	13566	42868	6951	857	5.59637	5.46754	0.112234	0.000122071	5.37359	4.20277	1.06604	0.00484208	0.730668	0.790706	0.129475	0.0258116
P.flavus CK2	13134	41622	5169	996	5.41528				3.9465				0.939301
P.flavus CK3	13076	39425	4347	838	5.39097				3.28822				0.702149
P.flavus freezing treatment-1	843	47827	76644	1721	0.262901	0.2425	0.0283861		61.186	58.8017	6.52651		2.0275	1.82887	0.186786
P.flavus freezing treatment-2	717	33790	64447	1474	0.210082				51.4183				1.65676
P.flavus freezing treatment-3	823	46879	79909	1571	0.254517				63.8008				1.80235
Sample Name	indole Peak area	AVG	SD	P-Value
P.flavus CK1	5068	6397.67	1871.66	0.0368176
P.flavus CK2	5587
P.flavus CK3	8538
P.flavus freezing treatment-1	14025	13442	573.736
P.flavus freezing treatment-2	13423
P.flavus freezing treatment-3	12878
