# Supplementary material for: Integration of the metabolome and transcriptome reveals indigo biosynthesis in Phaius flavus flowers under freezing treatment
Source: PeerJ. 2022 Mar 14;10:e13106. doi: 10.7717/peerj.13106 (PMC8929171; doi:10.7717/peerj.13106)
Supplement: Supplemental Information 6 [file peerj-10-13106-s006.xlsx]

## Sheet: Sheet1
			Enter the Ct value						AVG		SD		△				△△Ct±△SD		The final result
Sample Number			Target gene Ct (three repeats)			Internal reference Ct (three repeats)			Target gene	Internal reference	Target gene	Internal reference	△Ct	△SD	Determine the reference	△△Ct	Minus	Plus	Relative expression	Is deviation	Negative deviation
			2	2	2	1	1	1	2	1	0	0	1	0	1	0	0	0	1	0	0
CK1	PAI	Cluster-38184.138823	24.84	24.94	24.73	26.57	26.27	26.37	24.8367	26.4033	0.10504	0.152753	-1.56667	0.185382	-0.333333	-1.23333	-1.41872	-1.04795	2.3511	0.322379	0.283505
CK2	UGT2	Cluster-38184.119005	18.77	18.26	18.99	26.57	26.27	26.37	18.6733	26.4033	0.374477	0.152753	-7.73	0.404434	-0.333333	-7.39667	-7.8011	-6.99223	168.507	54.5238	41.1945
CK3	IGPS	Cluster-38184.112687	20.95	20.78	20.84	26.57	26.27	26.37	20.8567	26.4033	0.0862168	0.152753	-5.54667	0.175404	-0.333333	-5.21333	-5.38874	-5.03793	37.0996	4.79627	4.24719
CK4	UGT1	Cluster-12095.0	23.32	23.22	23.47	26.57	26.27	26.37	23.3367	26.4033	0.125831	0.152753	-3.06667	0.197906	-0.333333	-2.73333	-2.93124	-2.53543	6.6499	0.977749	0.852416
CK5	ASA	Cluster-38184.203518	24.42	24.04	23.98	26.57	26.27	26.37	24.1467	26.4033	0.238607	0.152753	-2.25667	0.283314	-0.333333	-1.92333	-2.20665	-1.64002	3.79298	0.823028	0.676283
CK6	GLU	Cluster-38184.103035	24.86	24.93	24.66	26.57	26.27	26.37	24.8167	26.4033	0.140119	0.152753	-1.58667	0.207284	-0.333333	-1.25333	-1.46062	-1.04605	2.38392	0.368345	0.319048
CK7	TSA	Cluster-38184.103420	19.52	19.62	19.98	26.57	26.27	26.37	19.7067	26.4033	0.241937	0.152753	-6.69667	0.286124	-0.333333	-6.36333	-6.64946	-6.07721	82.3293	18.0597	14.8108
CK8	CYP(CYP71A4）	Cluster-38184.135548	23.41	22.59	22.54	26.57	26.27	26.37	22.8467	26.4033	0.488501	0.152753	-3.55667	0.511827	-0.333333	-3.22333	-3.73516	-2.71151	9.33942	3.97724	2.78937
Freezing treat ment1	PAI	Cluster-38184.138823	25.42	25.72	25.14	28.64	28.81	28.42	25.4267	28.6233	0.290057	0.195533	-3.19667	0.349809	-0.333333	-2.86333	-3.21314	-2.51352	7.27695	1.99674	1.56682
Freezing treat ment2	UGT2	Cluster-38184.119005	24.74	24.88	24.96	28.64	28.81	28.42	24.86	28.6233	0.111355	0.195533	-3.76333	0.225019	-0.333333	-3.43	-3.65502	-3.20498	10.7779	1.81922	1.5565
Freezing treat ment3	IGPS	Cluster-38184.112687	22.31	22.22	22.37	28.64	28.81	28.42	22.3	28.6233	0.0754983	0.195533	-6.32333	0.209603	-0.333333	-5.99	-6.1996	-5.7804	63.5579	9.93854	8.5946
Freezing treat ment4	UGT1	Cluster-12095.0	28.84	28.89	28.12	28.64	28.81	28.42	28.6167	28.6233	0.430852	0.195533	-0.00666667	0.473146	-0.333333	0.326667	-0.146479	0.799812	0.797377	0.309488	0.222953
Freezing treat ment5	ASA	Cluster-38184.203518	25.53	25.34	25.83	28.64	28.81	28.42	25.5667	28.6233	0.247049	0.195533	-3.05667	0.315066	-0.333333	-2.72333	-3.0384	-2.40827	6.60397	1.61182	1.29561
Freezing treat ment6	GLU	Cluster-38184.103035	24.41	24.19	24.29	28.64	28.81	28.42	24.2967	28.6233	0.110151	0.195533	-4.32667	0.224425	-0.333333	-3.99333	-4.21776	-3.76891	15.9262	2.68057	2.2944
Freezing treat ment7	TSA	Cluster-38184.103420	17.51	17.83	17.68	28.64	28.81	28.42	17.6733	28.6233	0.160104	0.195533	-10.95	0.252719	-0.333333	-10.6167	-10.8694	-10.3639	1570.13	300.601	252.299
Freezing treat ment8	CYP(CYP71A4)	Cluster-38184.135548	23.08	23.25	23.19	28.64	28.81	28.42	23.1733	28.6233	0.0862168	0.195533	-5.45	0.213698	-0.333333	-5.11667	-5.33036	-4.90297	34.6953	5.53933	4.7767
		Cluster-12095.0
										FPKM	AVG	SD
							PAI	Cluster-38184.138823	CK	2.3511	0.322379	0.283505
							PAI	Cluster-38184.138823	Freezing	7.27695	1.99674	1.56682
							UGT2	Cluster-38184.119005	CK	168.507	54.5238	41.1945
							UGT2	Cluster-38184.119005	Freezing	10.7779	1.81922	1.5565
							IGPS	Cluster-38184.112687	CK	37.0996	4.79627	4.24719
							IGPS	Cluster-38184.112687	Freezing	63.5579	9.93854	8.5946
							UGT	Cluster-12095.0	CK	0.797377	0.309488	0.222953
							UGT	Cluster-12095.0	Freezing	6.6499	0.977749	0.852416
							ASA	Cluster-38184.203518	CK	3.79298	0.823028	0.676283
							ASA	Cluster-38184.203518	Freezing	6.60397	1.61182	1.29561
							GLU	Cluster-38184.103035	CK	2.38392	0.368345	0.319048
							GLU	Cluster-38184.103035	Freezing	15.9262	2.68057	2.2944
							TSA1	Cluster-38184.103420	CK	82.3293	18.0597	14.8108
							TSA1	Cluster-38184.103420	Freezing	1570.13	300.601	252.299
							CYP(CYP71A4)	Cluster-38184.135548	CK	9.33942	3.97724	2.78937
							CYP(CYP71A4)	Cluster-38184.135548	Freezing	34.6953	5.53933	4.7767
